# Supplementary material for: Genome-wide association studies for earliness, MYMIV resistance, and other associated traits in mungbean (Vigna radiata L. Wilczek) using genotyping by sequencing approach
Source: PeerJ. 2024 Jan 26;12:e16653. doi: 10.7717/peerj.16653 (PMC10823994; doi:10.7717/peerj.16653)
Supplement: Supplemental Information 1 [file peerj-12-16653-s001.xlsx]

## Sheet: Sheet1
Table S1. The details of Q-matrix.
<Covarient>
<Traits>	Q1	Q2
sam_100	0.05	0.95
sam_101	0.01	0.99
sam_102	0.006	0.994
sam_103	0.087	0.913
sam_104	0.058	0.942
sam_105	0.369	0.631
sam_106	0.137	0.863
sam_108	0.871	0.129
sam_109	0.003	0.997
sam_10	0.966	0.034
sam_110	0.4	0.6
sam_113	0.26	0.74
sam_114	0.261	0.739
sam_115	0.538	0.462
sam_116	0.389	0.611
sam_117	0.44	0.56
sam_118	0.513	0.487
sam_12	0.775	0.225
sam_128	0.378	0.622
sam_129	0.258	0.742
sam_130	0.291	0.709
sam_131	0.911	0.089
sam_132	0.097	0.903
sam_133	0.331	0.669
sam_134	0.088	0.912
sam_135	0.15	0.85
sam_136	0.704	0.296
sam_119	0.445	0.555
sam_120	0.427	0.573
sam_121	0.398	0.602
sam_122	0.784	0.216
sam_123	0.36	0.64
sam_124	0.829	0.171
sam_125	0.847	0.153
sam_126	0.672	0.328
sam_127	0.995	0.005
sam_13	0.36	0.64
sam_137	0.637	0.363
sam_138	0.387	0.613
sam_139	0.461	0.539
sam_14	0.416	0.584
sam_140	0.655	0.345
sam_141	0.088	0.912
sam_142	0.517	0.483
sam_143	0.387	0.613
sam_15	0.731	0.269
sam_16	0.104	0.896
sam_17	0.506	0.494
sam_18	0.366	0.634
sam_19	0.812	0.188
sam_20	0.258	0.742
sam_21	0.518	0.482
sam_22	0.02	0.98
sam_23	0.999	0.001
sam_2	0.007	0.993
sam_24	0.999	0.001
sam_25	0.12	0.88
sam_26	0.147	0.853
sam_27	0.003	0.997
sam_28	0.193	0.807
sam_29	0.177	0.823
sam_30	0.287	0.713
sam_31	0.304	0.696
sam_32	0.392	0.608
sam_33	0.43	0.57
sam_34	0.398	0.602
sam_35	0.225	0.775
sam_36	0.608	0.392
sam_37	0.19	0.81
sam_3	0.419	0.581
sam_38	0.466	0.534
sam_39	0.169	0.831
sam_4	0.403	0.597
sam_40	0.003	0.997
sam_41	0.279	0.721
sam_42	0.342	0.658
sam_43	0.91	0.09
sam_44	0.213	0.787
sam_45	0.273	0.727
sam_46	0.357	0.643
sam_47	0.046	0.954
sam_49	0.032	0.968
sam_50	0.224	0.776
sam_5	0.405	0.595
sam_51	0.26	0.74
sam_52	0.006	0.994
sam_53	0.385	0.615
sam_54	0.006	0.994
sam_55	0.493	0.507
sam_56	0.696	0.304
sam_57	0.543	0.457
sam_58	0.67	0.33
sam_59	0.881	0.119
sam_60	0.886	0.114
sam_62	0.973	0.027
sam_63	0.913	0.087
sam_64	0.686	0.314
sam_6	0.781	0.219
sam_65	0.134	0.866
sam_66	0.754	0.246
sam_67	0.546	0.454
sam_68	0.821	0.179
sam_69	0.69	0.31
sam_70	0.419	0.581
sam_71	0.653	0.347
sam_72	0.63	0.37
sam_73	0.503	0.497
sam_74	0.513	0.487
sam_75	0.446	0.554
sam_76	0.434	0.566
sam_77	0.328	0.672
sam_79	0.498	0.502
sam_80	0.297	0.703
sam_81	0.998	0.002
sam_82	0.996	0.004
sam_83	0.585	0.415
sam_84	0.281	0.719
sam_86	0.616	0.384
sam_87	0.69	0.31
sam_88	0.382	0.618
sam_89	0.375	0.625
sam_8	0.32	0.68
sam_9	0.466	0.534
sam_90	0.706	0.294
sam_91	0.136	0.864
sam_92	0.194	0.806
sam_93	0.233	0.767
sam_94	0.396	0.604
sam_96	0.459	0.541
sam_97	0.345	0.655
sam_98	0.524	0.476
sam_99	0.013	0.987
