# Supplementary material for: Genome-wide association studies for earliness, MYMIV resistance, and other associated traits in mungbean (Vigna radiata L. Wilczek) using genotyping by sequencing approach
Source: PeerJ. 2024 Jan 26;12:e16653. doi: 10.7717/peerj.16653 (PMC10823994; doi:10.7717/peerj.16653)
Supplement: Supplemental Information 2 [file peerj-12-16653-s002.xlsx]

## Sheet: Sheet1
Table S2. The details of SNPs, chromosomes, gene ID and candidate genes.
S. no.	SNPs Position	Chromosome no.	Start position	End position	Vigna ID	Arabidopsis ID	Candidate Gene name	Sequence
1	9481809	1	9481001	9488781	VRADI01G06080	AT2G15480	UDP-glucosyl transferase	ATGCATGTTCCTGAAGCTGCTGTTCATGTGGCTTTCCTCACAAATTCTGGTATGGGTCACCTCAACCCATGTCTCAGACTAGCCTCAGTGTTCCTCCGCCATGGTTGCAAGGTCACTCTCATCATTCCCAAACCCACTTTCACTCTTGCTGAATCAAACCTCATCTCTCGCCTTTGTTCTTCTTTCCCTCACCAGATGATGAGCAATGAGTCTTTGAGGATCAAAGCTGGAGAAATGAAGGAGGCAGCAAGGAAGGCTTGTGGTGTTGGTGGAAGTTCTAGAATGTTATCTTTCCTTGCATACGTTTCTGTTCTTGCTGATTCCGATCCAGCTGCACAACCACACCCGTCTACGTTAGTTGGTGATGCTATTCATATCCCGGGTATCACATTACCAATA…
2	21338870	2	21338451	21339912	VRADI02G11350	AT1G77300	histone-lysine N-methyltransferase ATX3	ATGGGAATGGGAGAAATTGCAGTGAGTGTGGTTTCAATGTTGCTGTTGATGGTTGGGTTAACAATGGGAATGCGTTTGAGTTCGACAACGGAATGGTACGCGTTGAGGGAGCTTCGATCGTCGTTGGGGATTAGGGCAAAGTATTGGCCCATAAAAACAGAACCGTGCCGGAACTGGACCGGAGTTCATTGCCGGAATGGTCGAGTTGTGGGTATAAACGTGTCCGGTTTGAGGAGAACCCGGTTGGGTAGCCTTAACCCAAGTTTTGAAGTGGGTTCTCTTGTGAATTTGACACTGTTGGAATCGTTTAATGCTTCTGGGTTCGTGCTTAATGGGTCTATTCCTGAGTGGTTGGGTGAGAGCATGAAGGTGTTGGATGTACTTGACCTTAGGCTTTGT…
3	21338870	2	21333663	21334283	VRADI02G11340	AT1G73260	kunitz trypsin inhibitor 1	ATGTCGGTGAAGTTGTTCGCTGCCGTTTCTCTTGCAGTGTGGCTTTTGACGGCCACATCAACACTGTCCCAATCCAACCGGTACGTGGTGGACACAAACGGCGACCATCTGGAAAGCGACGAGGAATACTACATCAGACCAGCCATAACAGACAACGGTGGCCGTTTCACCTTGATCAACAGGAACCAGTCGTGCCCTTTGTACGTAGGCCTCGAAAACACGGACTTACCACAGGGATACCCTGTGAGATTCACCCCTTTTGCCAACGACGAGGATGATGATGAAGTGAAGGTGAATAGGGACCTGAAAGTGGAGTTCGTGGAAGTTTCTTCGACGTGTGTGCAATCGACTGAATGGAGGTTGGGTGAGAATGACACCAGAAGTGGAAGAAGGCTTATC…
4	21338870	2	21310776	21327882	VRADI02G11330	AT3G19210	DNA repair and recombination protein	GTGTTCTATTACCTTGTTTTATATGTTTACACTGAACAACCAAACGATACTGAAGATATAGATTTTTGTTTGCGCAGATTCTTGTCTTCCCTGTTATCTCTGTTACAATACAACAGAAAAAACAAGTCTTTCTGTATCTTCAGTTTTGTTCCAGCAATAATGGATTTGATGTTCCCTTTGAAACCGCACAGTGTTATTCTCAAAGCACCACTCTTTTCTTCTCTGTCGTTCCCTCTTCCTCTCAGGTTCCGTGCTGTCACCGCTTTCAAGCATGTAAATATTCAATGCGAGCTTGAAGGTCGACCCAATGGTGCTCTCTCCGGTGGTGATTTCGACCCTCGCTTCATTGATAGGCAAAAAGCACTAGAAGCAGCAATGAATGATATAAACAGCTCCTTT…
5	1775779	3	1791098	1797025	VRADI03G01320	AT2G30580	E3 ubiquitin protein ligase DRIP2	ATGTCGAATCAGGTGGTGAAGGTGAGGAGGAACACGATTGTAGCATGCATGACTTGCCCACTCTGCAACAAGCTGTTCAGAGAAGCCACAACCATATCTGAATGTCTTCACACGTTTTGCAGGAAGTGCATTTATGATAAAATTACTGATGAGGAATTGGAAAGTTGTCCAATATGTGGCATTGATTTGGGTTGTGTTCCACTCGAGAAACTGAGGCCAGACCACAGTTTGCAAGATGTGAGGGCCAAAGTTTTCCCCTTGAAGGGAAGAAAGGTGAAGGCACCTGAAATTGTGACCTCAATACCATTACCAGCTAGGAGAAAGGAGAGATCTCTTTCGTCTTTGGTGGTGAACACTCCAAGGGTATCTACACAGGCAACAATGACAGGAAGAAGAACA…
6	33277966	6	33247347	33284542	VRADI10G01470	AT4G33200	myosin, putative	ATGAATCTGCTCCACGGCTCCAAGGTTTGGGTCGAGGACCGGGATTCTGCCTGGCTGCCAGCTGAAGTGCTCGATTCTGACGGTAACAAGATTCTGCTACTAACTGATTCCGGCAAGAAGGTGTTTGCTTCCAAGGAGAAACTGTTCCCGAGGGATGCTGACGAAGAGGAGCATGGCGGATTCGAAGACATGACGCGGTTGGCGTACTTGAACGAGCCTGGAGTGATGTTCAATCTTCGAAGAAGATACGCGCTCAATGACATCTATACATATACAGGCAGCATTTTAATAGCCGTTAATCCGTTCACAAAGCTTCCACATTTATATGATTCCCATATGATGGAGCAATATAAGGGAGCTCCATTGGGTCAGCTTAGCCCACATGTTTTTGCTGTCGCT…
7	4266669	10	4265856	4270038	VRADI10G01470	AT4G16280	flowering time control protein FPA	ATGTCTTTCTGTTGGATTGATAAGTCATCGGCAGTACCACGCGATGAAGATTACTCTTGGGATGAACGGAACTCAACAGTAAGGGGTTCTCCTTTCTCACAAAGAGAGTTTAGGGGACACCATGGTAGTCCTGGGCTGCAGTATTCTGACAAATCTAAGCTGAGTGACAAAAATCCAGAACCCAGTGAGGTCCTGTGGATTGGGTTCCCGGCTCAGTTGAAGGTGGACGAATCAATTTTAAAAAAGGCTTTTTCCCCATTTGGTGAAATAATGAAGATTACAACATTTCCAGGTCGTAGTTATGCATTTGTTCGCTTTAGGAGCCTTACATCTGCATGCAGAGCAAAAGACAATCTGAAGGGGAAGTTATTTGGAAATCCCCGTGTTCATATTTGTTTT…
8	14594975	11	14606725	14608439	VRADI07G06390	AT5G28540	heat shock protein 70	ATGTCCCATACAGGCATTAATAATTGGTTAGTTGCCTATGGTGCTGTAGTGCAAGGAAGCATTTTGAGCGGAGAGTGGGGTGAAGAAACCAAAGATATCCTTCTCTTGGATGTGGCTCCCCTTACCCTTGGAATTGAAACGGTTGGTGGAGTGATGACAAAGTTGATTCCCAGAAACACTGTTATCCCAACAAAGAAAACTCAAGTGTTTACCACCTACCAGGACCGGCAGACCATTGTCTCCACTCAGGTTTTCGAAGGTGAGAGGAGTCTCACAAAAGACTGTCGTCTGCTTGGGAAATTTGATCTGTCAGGAATTCCTCTAGCTCCAAGGGTTACCCCTCAAATTAAAGTGACCTTTGAAGTTGACGCAAATGGCATCCTAAATGTGAAAGCAGAA…
9	8568214	11	8575102	8578931	VRADI08G04550	AT3G51860	vacuolar cation/proton exchanger 3	ATGGGTTCTCACCAACACGAACCATGGCTACTGGAGAACGGAAACCCGAAGGTGTTGACAAGGGAAATGAGACATGGTCGCACTGCGCACAGCAAGTCTTCCAACTCACTTCGCACGAAGTCTGATCGCACTCTTGTTTCTAAGGTTCCCTGTGCCACTATCAGAAACGTACTTTTCAACTTGCAAGAGGTTATCCTTGGCACCAAGCTTTCCATTCTCATCCCTGCCATTCCTGTTGCCATTGTTGCTGAGTACTGTGGCTTTGGAAGACCTTGGGTTTTCGTGTTGAGCTTGCTTGGACTTACCCCACTTGCTGAACGTGTGAGCTTCATCACTGAACAAGTTGCCTTCTACACTGGTCCTACAGTTGGAGGACTTCTGAACGCGACGTGTGGGAAT…
10	8568214	11	8561422	8565745	VRADI08G04540	AT3G51870	mitochondrial substrate carrier family protein B	ATGTCTATTTCCATGTCCCACACAGAGGAGAGAGCCACACTCACATGGCGCAAAATCCCCGCCCCTCCCAAATACGACGTCGTTCGCCCCCGTTTCCGTCACGCCGCAGCCACTACCCATTCCAGATTCGCCTCTGTTTCCGTAACCCAATCCAAACTGCACCAAGACTTCATGCCCACACCCTCCCAGCTCCTCAAGCACCCCCTTGCAGCCTTCTCCGTAGTCCCCCGCGACGCCGCCCTCTTTTCCGCCGGAGCCATCGCCGGCGCCGCCGCCAAGACCGTCACGGCGCCGCTCGACCGCATCAAGCTCCTCATGCAGACTCATGGCGTGCGGGTTGGCCAAGATAGTGCTAAGAAGGCCATGAGTTTCATTGAGGCCATAGCAGTTATAGGGAAG…
11	20878724	5	20836591	20841432	VRADI05G11900	AT3G21320	protein EARLY FLOWERING 3	ATGAGGAGAGGGAAGGATGATGAGAAGGTGATGGGGCCAATGTTCCCTAGGCTACATGTCAATGATACAGAAAAGGGAGGACCAAGAGCACCACCTAGGAATAAGATGGCCCTCTATGAGCGGTTTAGTATTCCCTCTCAAAGGTTCAATTCAGGTGTTCTGCCACTCAACCAAAATATTTCCAGTAATACTGCTCCCCCTACATCCTCAAGTCAGGGGACTGTCCCTGAGAGAAATCATGTCTTTCCTGTTCATATGCCATCGCAGAAACCTATTCGTCCCGTAGAAAAATGTCACTCTCGCCAATCGGAAGAGGCAAATTTGACTTGTTCTCTTGAACAGAGAAAGAAGGTATATGAAGAAGACTTTAGGGTTCCTGTATACGTTCATTCAAGGGTT…
12	20878724	5	20891041	20891644	VRADI05G11940	AT4G17460	homeobox-leucine zipper protein HAT22	ATGGTCTTAGTGTCTTCGTTTCTTAACTCATCAAGCATCATCAAGAGAGAGCGAGATGAGTTCGCGGGTGAAGAATTTGAGTTAGAGGTAGAGAAGTTTCCCTCAAACTTAAGAGTTGTGGATCTTGATGAATATGGTTACTCCAAGAAGAAGCTTAGGCTCACCAAAGAACAATCTGCAGTCTTGGAAGATAGCTTCAAAGACCATTCTACTCTCACTCTGGTGTAG
13	53530943	7	53528305	53535462	VRADI07G29810	AT4G23640	potassium transporter 1	ATGCTAGTACATTCAACACGTACAGGGGGAATTGTTGCTTTGTATTCACAGCTTTGCAGAAATGCAAAATTTTGTTTGCTTCCTAATCATCAAGCTTCTGATGAGGAGCTTTCTACATATCTCAAACTTGGTTCCTCAAATAGAAGTATACCACCATCTCCTTTGAAAAGATTCATTGAGAAACACAAGAGTACAAAGAAGGCTTTGCTTATTTTTGTTTTACTGGGTGCTTGCATGGTGATTTGTGTTGGTGCACTCATGCCTGCCATTTCTGTTCTTTCATCCATTAAAGGCCTGGAAATTGAAGCAAAGATTGCAAACAAAATGATTGGACTCTTTGTTATGCAACACCGTGGCTCCTACAAGGTTGCATTTGTATTTCCTCCCATAATCATTCTA…
14	53530943	7	53520228	53526097	VRADI07G29800	AT4G23650	calcium-dependent protein kinase 6	ATGGGTAACTGCAGCAGCAGCAGCAACGGCGGCGGTGCTGCCTCCTCAACCACTACTTACTCCGACGACCTTCCCCAGCGCAACGGCATCACCGTCCTACCCCCGAACACGAACCCTTCACCCCCACCCCCGAAGCCACAAGCGTCGTCCTCGCTGGGCCGGGTTATTGCTGAAAATCTTTCTGAAGAAGAAATTATTGGCTTGAAGGAAATGTTCAAATCCATGGATACAGATAACAGTGGAACAATCACATTTGAGGAGTTGAAAGCTGGTCTCCCAAAACTGGGTAGTAAACTTTCTGAGTCCGAAGTTAGGCAGTTGATGGAAGCGGTGCATTTCACCGTTTCCCCATCGTTTCATACTCCTTCAGCATCTTGGGTCATGGGGCCACATCACTTA…
15	18248253	8	18244526	18246147	VRADI05G09940	AT3G15680	Zinc finger (Ran-binding) family protein	ATGGTGGAATCTGGAAACTATGAAGGGAAAATGAGCAGACCAGGAGATTGGAACTGCAGGACATGCAACCACCTCAACTTCCAGAGAAGAGAATCGTGCCAGCGATGCGGGGAGCCAAGGAGTGCCGGCGACTACGGCGGCGCCTTCGGAGGCAGAGGCTCTTCCTCCTTTGGCTTCACCACTGGCCCTGATGTTCGCCCCGGTGACTGGTACTGCACCGTCGGAAACTGTGGAGCCCACAACTTCGCCAGCCGCTCCAGCTGCTTCAAGTGCGGTGTCTCCAAGGAGGACTCCTCCACCGGATCATACGACCTCGACATCACCCGAATGAGACCCTACGGCTTCGGCAGCGGCTCCTCCGCCCGACCCGGCTGGAAATCCGGTGACTGGATATGCACC…
16	20696710	1	20692686	20706429	VRADI01G10410	AT5G15400	U-box domain-containing protein 3	ATGTGTGCTCAACCTATCTCGACCCGATTGGGCCTGATTCGACTCGGTTCAAGATGTTGGTATCACCCACTTGCCTCAACTCAAGGTGTGTTTGACTTGACTTCGCTTAAGCTTGACTCAACTTCAACCCGAGATGGGCTTGACTCTACTTGGCCCTACTCAACTAGATCTAAGGTATGTTTGGCTTACCTCAAGTCGAGATCTGAACTCCTTCCACTCAACCACAAGCCACCATGGCCACTACACTTGCTTGGAGACACGCTGCCAACAATGCAAATGATCTGTTTTGTGCTAGACGTTTCGCGACTCTGGGACGTGTCATTGGGGATCGTTCATTCATGGATGTTTAAAGGAACTATGCATGGTTCCTTGCTGATGTATTATATTGCTGAAGAACTA…
17	20696710	1	20684812	20688192	VRADI01G10400	AT4G39700	heavy metal-associated isoprenylated plant protein 26	ATGTCCAAGCCGACTCCATATCCATTCAGTCAGGCCACTTCTCCGTCTCCATATATAAACCGTAAACAGCAGAAAGTGACAGTAAGTGGGTATGTTGAAGCAAACAAGGTGTTGAAGAAGGCGAAGTCAACAGGGAAAAAGGCTGAGATTTGGCCGTATGTGCCATACAATTTGGTGGCACATCCATATGCAGTTGCAGCTTATGATAAGAAGGCTCCTCCTGGTTATGTGAGGAGAGTGGAGATTGCTGCTAACACTGGAACAATCACAAGATATGAAGACCCTTACGTCACCATGTTCAGTGATGAAAACCCAAATGCCTGCTCTATCATGTAG
18	5741092	1	5710582	5714237	VRADI01G03610	AT4G15450	Senescence/dehydration-associated protein-related	ATGGGTTGCCAAGCCTCGAAGGAGAAGGCACCATATGAAGACTCCATGCACCATGCAGGTTTTCAAGAGTTGCAGAAACCGAAAACTCCCACACAAGAAGTTGTGCTGCAAGTTCCAGGATGCAAAGTTCATCTGGTGGACGATGGAGAAGCCCTTGAGCTGGCTCAAGGGCACTTCACAATCATGAGGGTGATGGAGCAGAACGTGGCACTGGCAACAGTCATAAAAGTTGGAAACAGTGTTCAGTGGCCATTGACAAAGGACGAGCCAGTGGTGAAGGTGGATGGTCTTCACTACCTCTTCTCTCTGCCGGTGAAAGACGGTGGTGAGCCTCTGAGCTATGGTGTGACCTTTCCAAAAGAGTGTTATGGGAACATGGCGATGGTGGATTCTTTTCTG…
19	23630852	2	23630660	23634509	VRADI02G13390	AT5G25510	Protein phosphatase 2A regulatory B subunit family protein	ATGTTAAAGCAAATTCTTAGCAAATTGCCCAAGAAGGTGCCAAAATCTGACACATCAGATTCGGCTCAGGGTGATTCTGGGAGTGCTACTACTTTTGCAAATGTCTTTCAGTGTTCGAATGTTGGGGTTGCAATTTCAAGCAAATTAAATGCAGTGAAGCGGGTATCATCAGTGGTATTTCCAGCAAGCTTGAGTGCTGGAGTGGAAGCAGTTGATCCCCATATATCTTTCAAAGATGTTTCAAATATACAGAAGCAAAACCTGTTTATCAGTAAGTTGAATCTTTGCTGCACTGTTTATGATAAGAATTGCACAGAGAAAGATGTTAAACATCAAACATTAGTAGAGCTTGTTGATTTTGTTTCTTCTGGATCTGCAAAGTTCACAGAACCATCAATA…
20	1490082	5	1506441	1510662	VRADI05G01370	AT3G57430	Pentatricopeptide repeat (PPR) superfamily protein	ATGCATTCGAATCTTAACCTTATCCAACCGCCACTCCCCTATCCTTTTTCCCTCCAAACCCATCACCAAATCCGCACTCTCCCGACTCCCAAACACCCTCCTCCACCCACCGTCACCGCCACCGCCGACGCCGTAGAACTCCGTTCTCCGTCCCAATGGATAGACCTCCTCCGATACCAGACCCAATCCTCTTCCTTCCACGACGCCATCGCCACCTATGCGGCCATGCTCGCAGCCGCCGCAACCCCCGACAATTTCGCCTTCCCCGCCGTTCTCAAGGCTGCAACCGCCGTGCACGACCTCAGCCTCGGGAAACAACTCCACGGGCACGTCTTCAAGTTTGGCCACGCGTCCTCCGTTGCCGTGGCTAACACCCTTGTCAACTTGTACGGCAAATGC…
21	36043468	6	36055395	36060459	VRADI06G15850	AT1G68690	Protein kinase superfamily protein	ATGGGAATGGGAGAAATTGCAGTGAGTGTGGTTTCAATGTTGCTGTTGATGGTTGGGTTAACAATGGGAATGCGTTTGAGTTCGACAACGGAATGGTACGCGTTGAGGGAGCTTCGATCGTCGTTGGGGATTAGGGCAAAGTATTGGCCCATAAAAACAGAACCGTGCCGGAACTGGACCGGAGTTCATTGCCGGAATGGTCGAGTTGTGGGTATAAACGTGTCCGGTTTGAGGAGAACCCGGTTGGGTAGCCTTAACCCAAGTTTTGAAGTGGGTTCTCTTGTGAATTTGACACTGTTGGAATCGTTTAATGCTTCTGGGTTCGTGCTTAATGGGTCTATTCCTGAGTGGTTGGGTGAGAGCATGAAGGTGTTGGATGTACTTGACCTTAGGCTTTGT…
22	10946628	9	10949253	10955046	VRADI09G06940	AT5G36930	Disease resistance protein (TIR-NBS-LRR class) family	ATGTCTTACACTTCATCATCCTCAAAATCTAAGCTCCGATGGATATACGATGCGTTCATCAGTTTCCGCGGGGAAGACACTCGTAAGAATTTCGTTTCTCATCTTTATTCCGCTCTTGCAAATGCCGGAGTCAACACTTTTCTGGACGATGAGAAGCTTGCCAAGGGACAACAGCTGAAAACAGAACTGTTTCATGCAATAGAAGGCTCTCAAATTTCCATTGTTGTTTTATCCGAAAACTACATTTACTCTACATGGTGTCTCGACGAACTAGTCAAAATCATGGAATGCCATGCTTTTAGAGGTCAAGTGGTTTTACCCGTGTTTTACGGCGTTTTCCCTCGGTTTCTACGTGGCCTTAACGATGTTTCTTTCGAAGTCATTCTGGAAAAAGCTAGT…
23	12626404	9	12631303	12634002	VRADI09G07560	AT2G21290	30S ribosomal protein S31	TTATTAACAAAACTACTTCCGATTACACTATACAAACTACCCTGTGCAGTGCACCATTTTCCTCCTTGTCTAACCTTATCCCTTGAGTTATCCTCAGCCATCATGGCGTCACTGCTCCTAGCATCACCTCCTCCACTCTCCACTCGATTGCACACTTCCACCTCTCACCTTTCCTTCTCTCACTCCCAAACTCTGTTCTCACCACTCTCCACGCCCTTCCCTTCCCTCTCAGCCTCTGCAACCTCCACGCTCTCCCCAACCCCTTCTGTGTACTGTGGCAGAGGAGACAGGAAAACTGCAAAGGGAAAGCGCTTCGCCCATTCGTTTGGGAATGCAAGGCCAAAGGACAAGAAGAAGGGTAGAGGGCCACCGAGGATTTATGCTCCACCGGTACCTTCC…
24	5708348	1	5692244	5700487	VRADI01G03580	AT4G08990	DNA (cytosine-5-)-methyltransferase family	ATGTCCACCAAGCGCAAAACAAGGTCTTCCTCTTCTCCTTCCCCTGCTTCCTCCATGAAGCGTGTTACTCGTTCATCGGTCACTCCTATCGTTCCTTCCAGTTCTCCTTCTCCAGCCTCCTCCCTCAAGCGTGTTACTCGGAATGTCGCTTCAAATTCCGGTAAGTCTAAGGACAAGGTTGTTGATGTCACTTCAAATTCCCGTAAGTCTAAAGGCGCCGTCAAAGAAGAGATATCTTCCTCTGCCGTCAAAGAAGAGATATCAACCTTCATGGATGTGACACCATCAACACCTGACGGGGAAGGGTCCAATGTGAAATTCATAGGAGAGCCTGTTCCTATTGAGGAAGCCAGAAGGCGCTGGCCCAAACGGTACCAGGAGAAGTTAAACCACTTTGTG…
25	7977153	3	7968517	7970262	VRADI03G06560	AT1G30650	WRKY family transcription factor	ATGGACACTGATGCTAATGCCTCTTCCCAACCCGACTCAGAACCATTTTCAGAGCTCAAATCATCGGAGACTCAAACATCAAAGAAAAGGAAACTGGTTGAGAAAACAGTCGTGGCGGTGAGGATAGGAGAGAATGTTGGGAAGCTGAAGAATGAAGGGCTACCTTCGGATTTTTGGTCTTGGAGGAAATATGGACAAAAACCAATCAAAGGGTCTCCATATCCAAGGGGCTATTACAAGTGCAGCACATCCAAAGGTTGTTCGGCCAAAAAGCAGGTAGAGAGATGCAGAACAGATGCTTCAATGCTCATCATCACATATACCTCTACGCATAACCATCCATGCCCCACCACCACAAATTCACCCCAACAACCAAAAGAATACGAATCCGAAACGACC…
26	8099163	3	8099071	8100140	VRADI03G06700	AT3G06490	myb transcription factor	ATGGAGAGGAGTTTAGCAGAAAATGGTTCATCTGGAACGTATGGAAGCAGTGAAGAGGAGATGTCAATAACGAAAGGTCCATGGACAGAGGAAGAAGATTCAGTTCTCTTCGATTACATCACAGTTCACGGTCTCAAACGAACGGGAAAAAGCTGCAGACTGAGATGGTTGAACTACTTGCGTCCCAACGTTCGACGCGGGAACATAACGCTCCAAGAACAGCTCATGATTCTTGACCTCCATTCCCGATGGGGCAACAGGTGGTCGAAAATAGCTGAACATTTACCGGGGAGAACAGACAACGAGATTAAGAACTACTGGAGAACTAGAGTGGTAAAGCAGGCTAAGCAACTGAAATGTGACGTGAACAGCAAACAATTCAGAGACACGTTGCGTTTT…
27	8099163	3	8092219	8095631	VRADI03G06690	AT1G02400	gibberellin 20 oxidase 2	ATGGTTGTGCCTTCTCCAACATCCAGCAAGATAACTTCCAATAAAACAAGGGCAATGGGAATCCCGACCATTGACCTATCCATGGAAAGGTCACAGTTATCGCAAACTGTGGTGAAAGCCTGCGAGGAATACGGTTTCTTCAGAGTGGTTAACCACAACGTGCCGAAGGAGGTTATTGCAAGATTGGAAGAGGAAGGTGCAGAGTTTTTCTCAAAACCCAGTCACGAGAAGCGTCGGGCTGGGCCCGCAAGCCCGTTCGGTTACGGCTTCACCAACATTGGGCCCAATGGAGATATAGGTGACCTGGAGTATCTTCTGCTTCATGCTAACCCTCTCTCCATCGCTCAGATATCCAAAACCATCGCTAACGACTCCACCAAGTTCAGTACGGTTGTGAAG…
28	24637037	2	24625842	24630418	VRADI02G14060	AT4G19990	Protein FAR1-RELATED SEQUENCE 4	GATTTCGAGGACAATCAAGATTTTGTTGTGACGTGGAATGAATCGACTTCAGAAGCATCATGCTCTTGCTATTCATTTGAGTTTAATGGCTATCTTTGTAGGCATGTAATGATTGTGCTACAGATTTCTGGTGTACATAGCATCCCACCTCGGTATATATTAAAACGCTGGACAAAAGATGCCAAGAAAAGAGATCTGTCTGTGGCAGATGTCGTTGTCTCTGACTCTAGGGCTGAGCGCTATAATAATTTATGTCAACGAGCTTTTGAGTTGGGTGATGAAGGGTCTTTATCATACGAGACTTACATTGCTTCTGTAAAGGCGTTGGAAGAAGCTTTGAGAAAGTGTGAGAACCTGGATGGTTCAATTCAGAGAGTCAGAGAACCGAACCTTCCATGT…
29	24637037	2	24642395	24647319	VRADI02G14090	AT2G18510	RNA-binding protein 39	ATGACGACTCGAATTGCACCTGGTGTGGGAGCCAATTTGCTCGGTCAACACGCCGCTGAGAGGAATCAAGATGCCACTGCTTATGTCGGCAATCTCGACCCTCAGATTAGCGAAGAATTATTGTGGGAGTTGTTCGTTCAAGCTGGTCCAGTGGTTAATGTCTATGTTCCGAAGGACAGAGTGACCAACCAACACCAGGGTTATGGGTTTGTTGAATTCAGGAGTGAAGAAGATGCTGACTATGCCATCAAGGTTCTTAACATGATCAAGCTTTATGGGAAACCAATCCGTGTGAATAAGGCATCCCAAGATAAAAAGAGCTTGGATGTTGGTGCAAACCTTTTCATTGGTAATCTTGATCCTGATGTAGATGAGAAGCTCTTGTACGATACTTTCAGT…
30	7033669	4	7029108	7034064	VRADI04G03540	AT2G16650	proteinaceous RNase P 2	ATGGAGAATCCAAAGAAGAAGAAGAAAACCAGTCAAAATCCTGAGGCAAAGTTCCAATTTGAGCTCAACTCGTGTTCCAAGGCTAAGGACCTGCGAGGCGCCATATCTCTCTATGACGACGCCGTTTTGAACAACACCCGCCTCAACCAACACCACTTCAATGCCCTCCTCTACCTCTGCTCCAACTCCGTCGCCGACCACTCGCTCAAAACCACCGCACTTGATTACGGTTTCCGCGCCTTCCGCCACATGTCCGCTCTCGGCGTCGTTCCCAATGAGGCCTCTGTCACCGCCGTCGCGCGCCTCGCTGCGGCCAAGGGTGATGCCGATTATGCCTTCGAGTTGGTGAAGGGCATGGGCAAGTACAACAATGCTACCCCGAGACTGCGAACCTACGAT…
31	18927073	11	8925287	18934324	VRADI11G12970	AT2G01735	E3 ubiquitin protein ligase RIE1	ATGTCATCACAGATACCCACAGCGGAGGCGCCGCTGCTCCGCAACCGCCACGACGCCGCCAGAGGGCCAGCGCTAGCGCTCCTCCTCGGACGAGCCGGCCGTCGAGGCCCCTCCATGCTAGTGAGGGAGACCGCTGCGCGCGAGCTCGAGGAGCGCCGCACAGACTGGGGTTACTCCAAGCCGGTGGTGGCGCTTGACATGTCCTGGAACATGGCCTTCGTGGTCGTCTCGGCCGCGATGCTTGCATGCACCGTCAGCGAGCGCCCGAACTCGCCGATCCGTGTGTGGATCATCGGGTACGCGCTGCAGTGTCTTGTGCATGTGGTGCTCGTCTGGCTCGAGTACAGGCGTCGTAGCCGGGTTGACTCGCGCCGCGGCCAGGGGATGCAGGACGTGGAG…
32	5025034	6	5012124	5012669	VRADI06G04290	AT3G11090	LOB domain-containing protein 21	ATGAAGGGTTACGAGCCACGTTCGAGTTCCTCTTGTGCAGCCTGCAAGTTCTTGAAGCGAAGATGCATACCCAATTGTATATTTGCACCTTACTTTCGTTCTGATGAGTGCAAGAAATTTGCGAAGGTGCACAAGGTTTTTGGAGCCAGCAATGTCAGCAAGATCCTCATCGAAGTTCCCGAGGAGCAGAGAGAGGACACCGTCAATTCTCTTGCTTACGAAGCAGAAGCCAGGCTCAGAGACCCCATTTATGGATGTATCGGTGCCATAGCTCTTCTCCAGAGGAAGATGCTCGAGCTTCAACATGACCTTGCCATTGCTAAGGATCGTCTTGCTCGTTATGCTGCCGCTGCCACCACTCCTTCCGCCGCCATCGCCACCTCCAACAACACCTTCAAT…
33	41731553	7	41687381	41723765	VRADI08G19670	AT1G65800	receptor kinase 2	ATGGCTTCATTTTACTTGTTCATTTTGCACCTATCTTTCTTTTCCCTCTTTATTCATTGCTCTCCTTATAATATCATCCAAGGTGCTACCCATGAAAATCCCAAAGCTTTTTATAACTGCACAAGGAACACCACTTCTGCTTCCTATAGCGTGGCTTACCGTTCTAACGTCAAAACACTCCTAGATTGGCTCTCCTCCAATGCCACCAACCACGACAGATTCTACAACACCACAGTTGCTAGTGGACACACAGAAAACACTGCCTATGGTAGCTTCCTTTGTACTAGAGGCTTCCCTAAACTCTGCCAACAATGCGTCACAGAAGCTGCCAAACTTCTATCATCACTTTGCACCATTGCAAAAGAGGCTATTATATGGTACGAAGCGTGCTATGTGCGC…
