# Supplementary material for: Genome-wide association studies for earliness, MYMIV resistance, and other associated traits in mungbean (Vigna radiata L. Wilczek) using genotyping by sequencing approach
Source: PeerJ journal article supplement (doi:10.7717/peerj.16653), 2024-01-26
Supplement: Supplimentary_file_final.pdf [file Supplimentary_file_final.pdf]

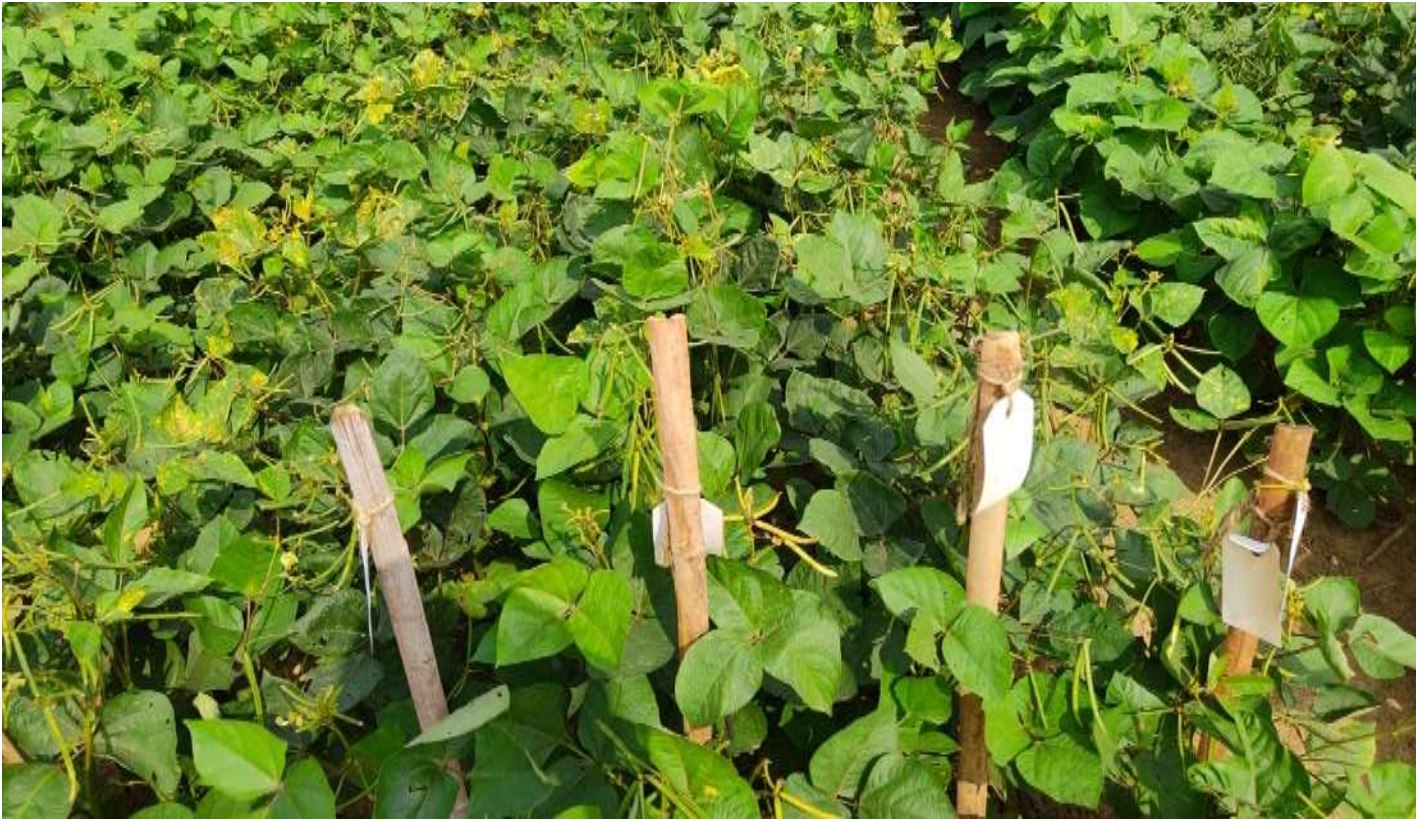

**Figure S1.** Mungbean genotypes grown in field.

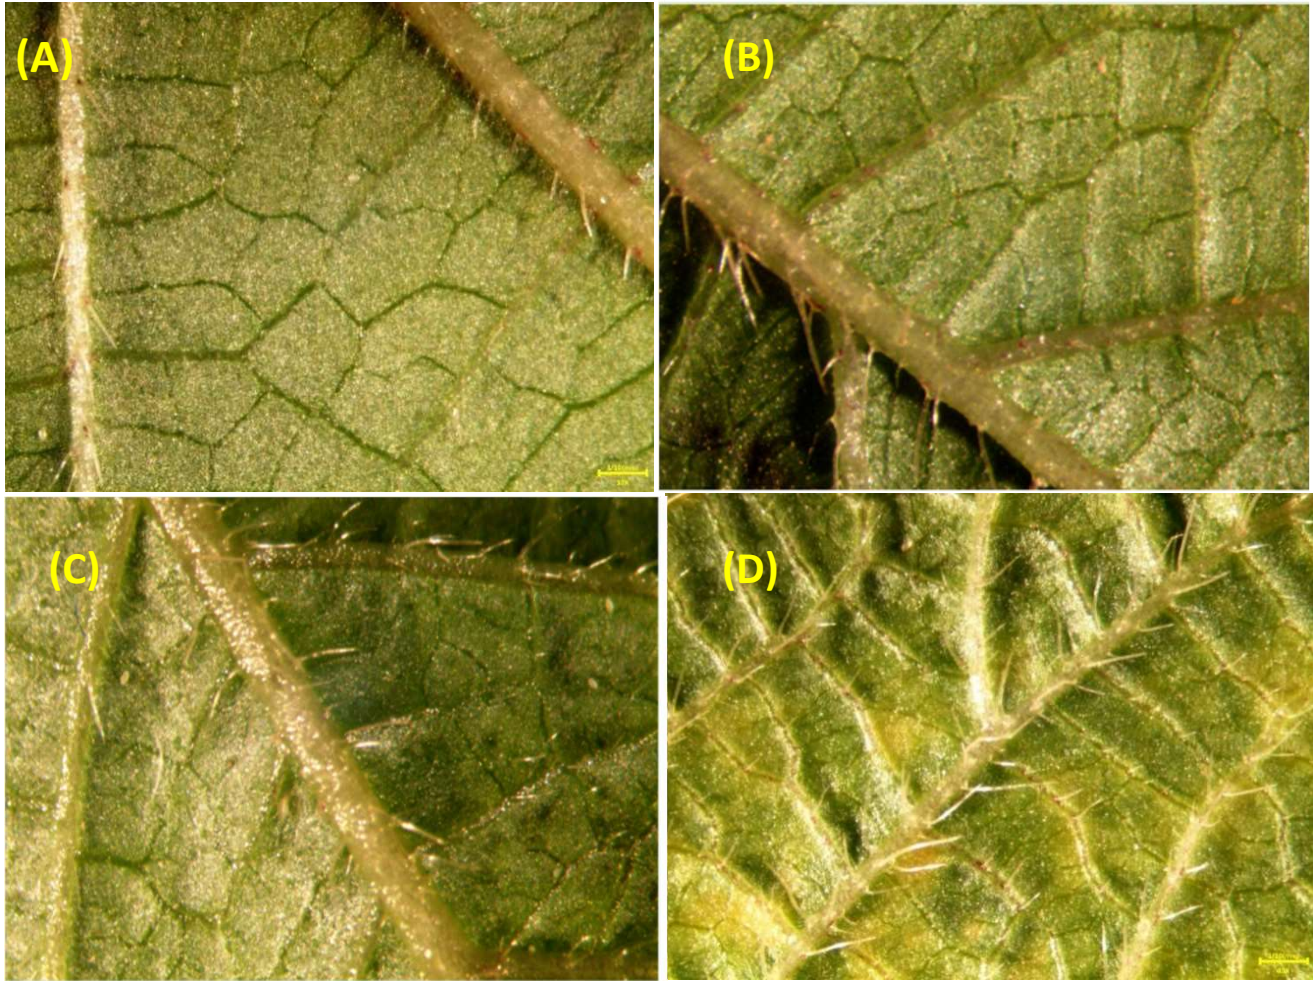

**Figure S2.** Trichomes range in different scale. (A) scale range 1, (B) scale range 2, (C) scale range 3, (D) scale range 4.

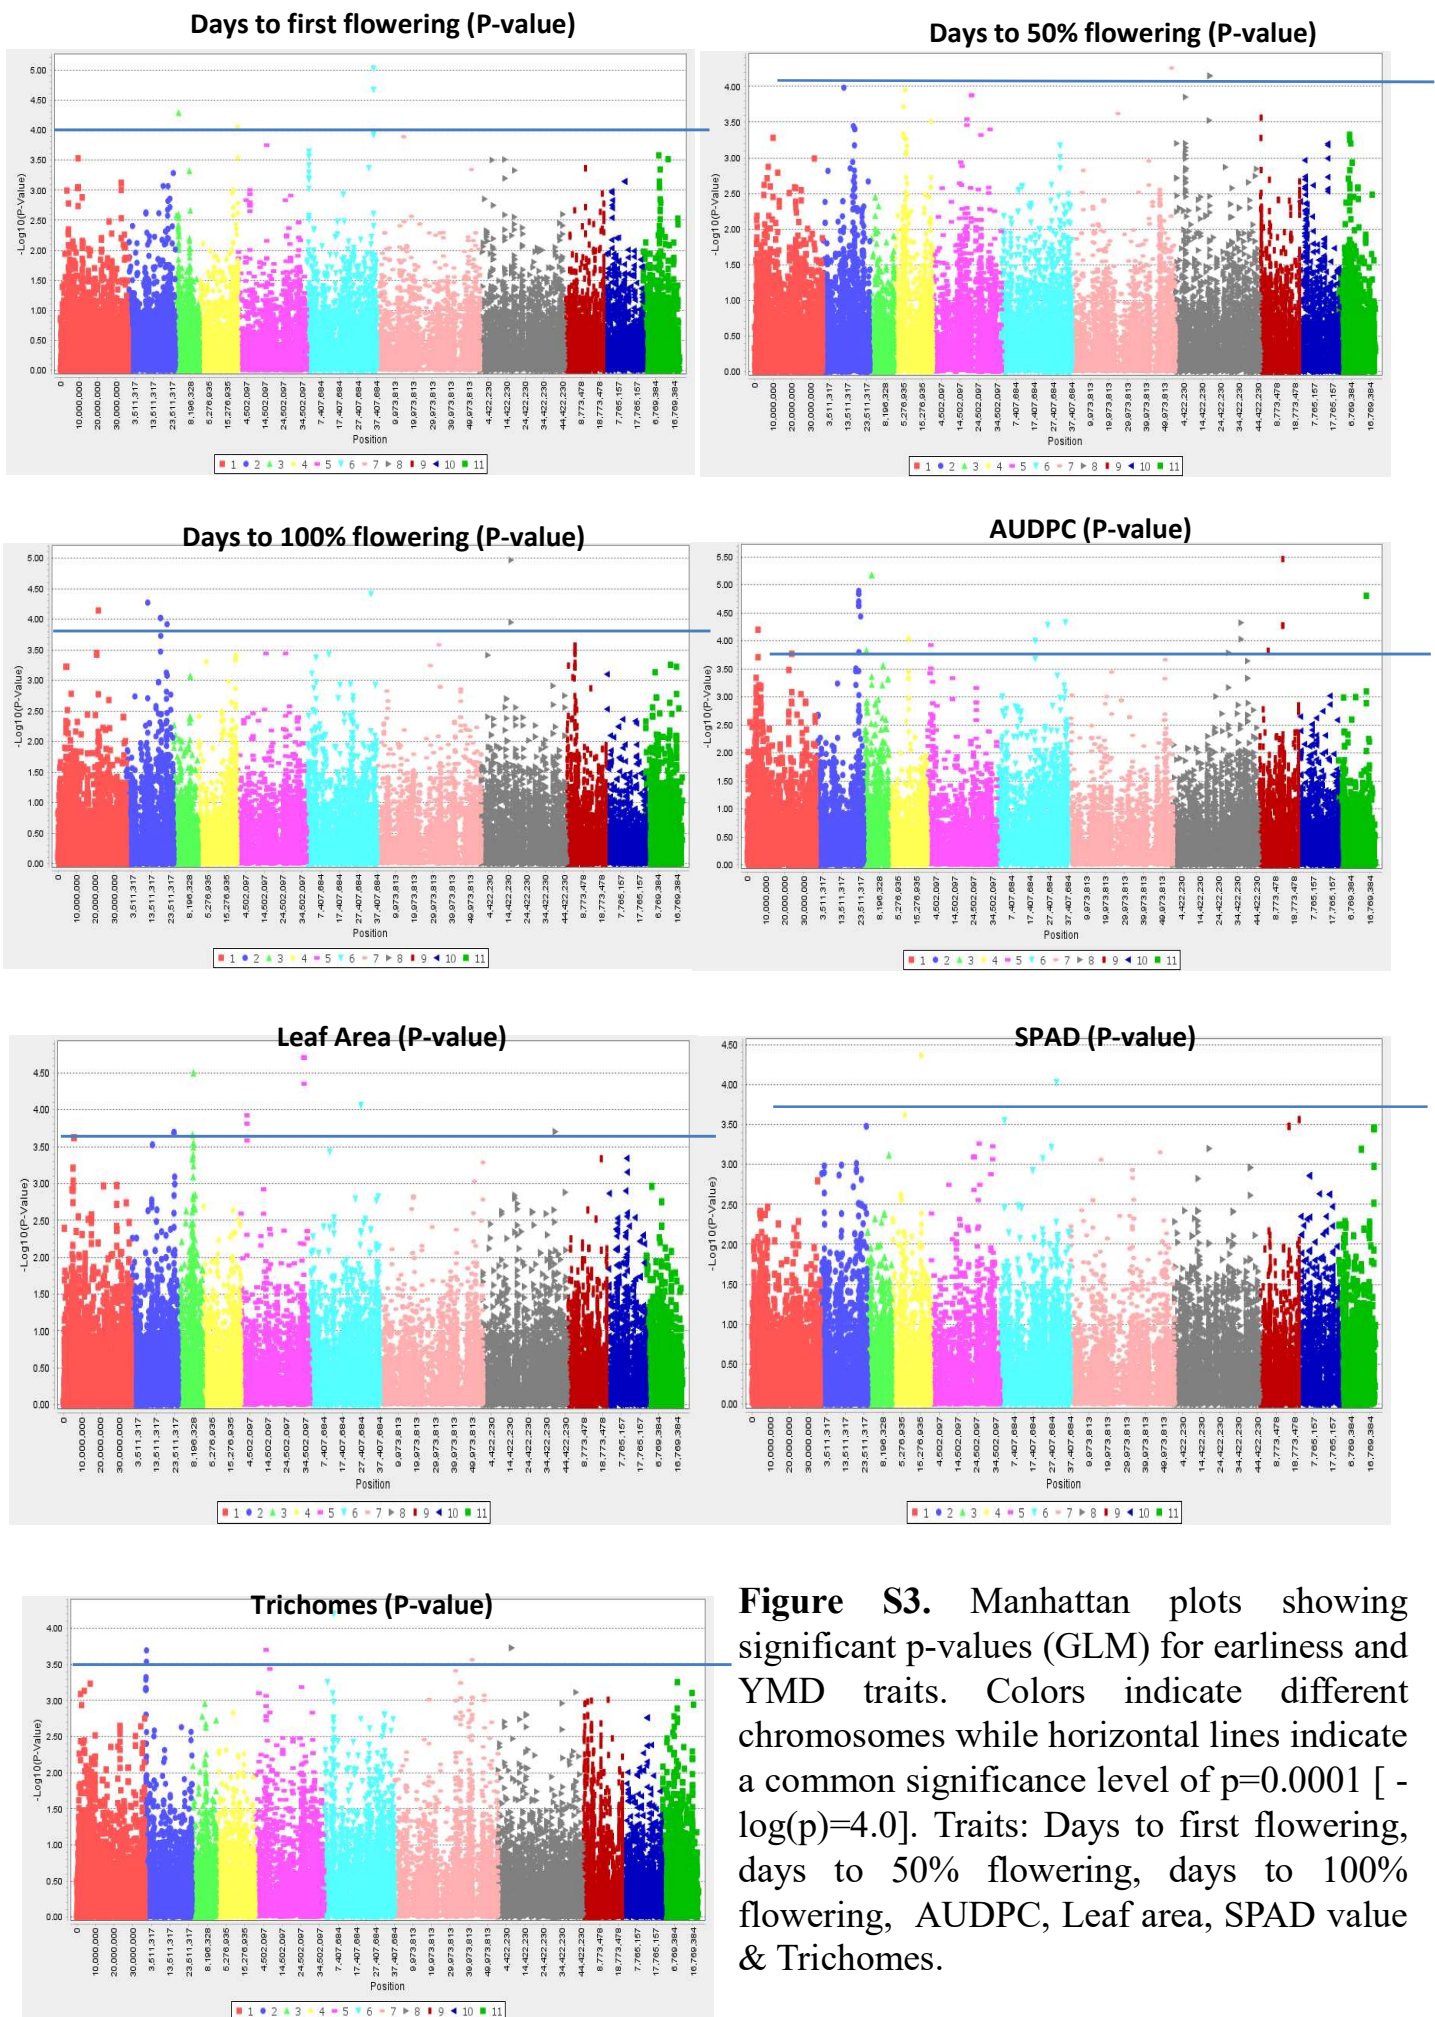

**Figure S3.** Manhattan plots showing significant p-values (GLM) for earliness and YMD traits. Colors indicate different chromosomes while horizontal lines indicate a common significance level of  $p=0.0001$  [ $-\log(p)=4.0$ ]. Traits: Days to first flowering, days to 50% flowering, days to 100% flowering, AUDPC, Leaf area, SPAD value & Trichomes.

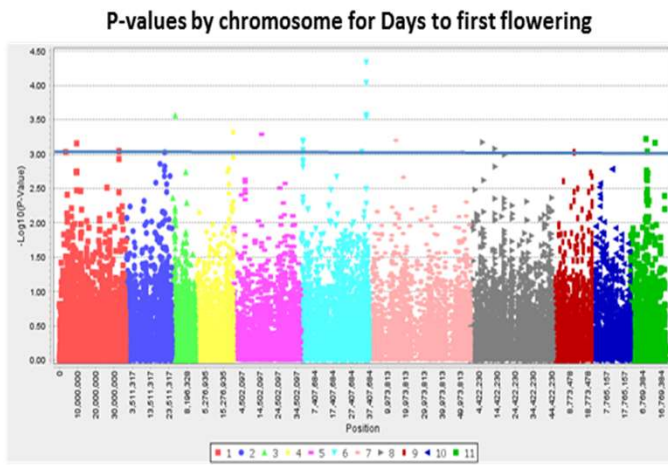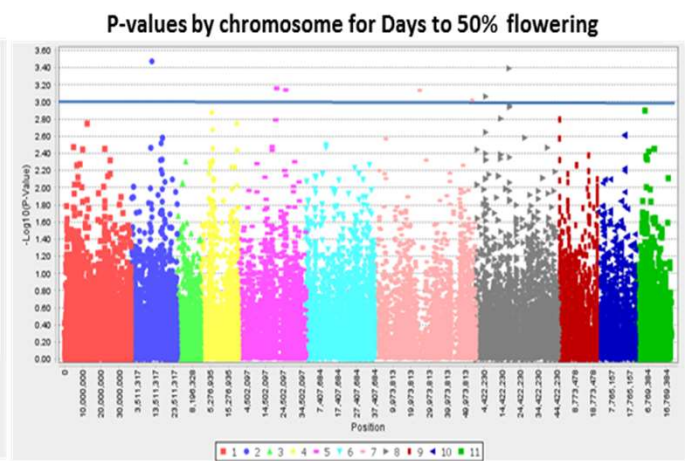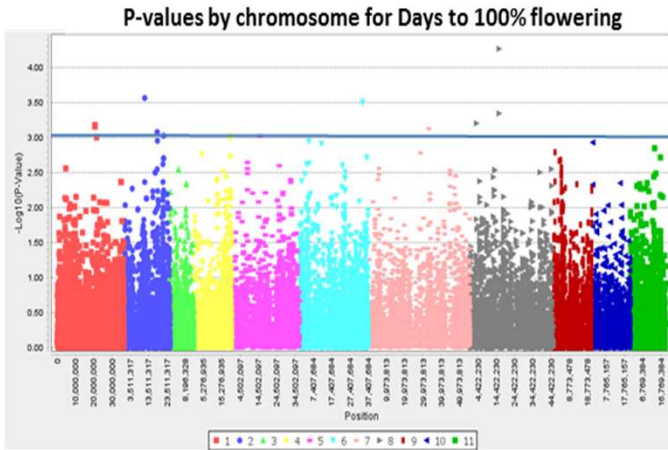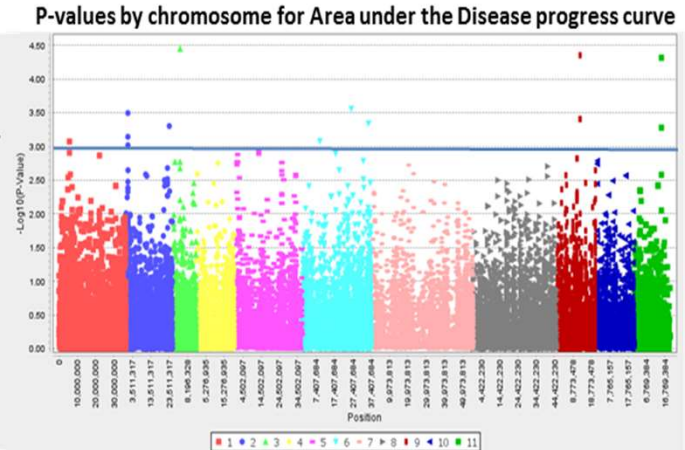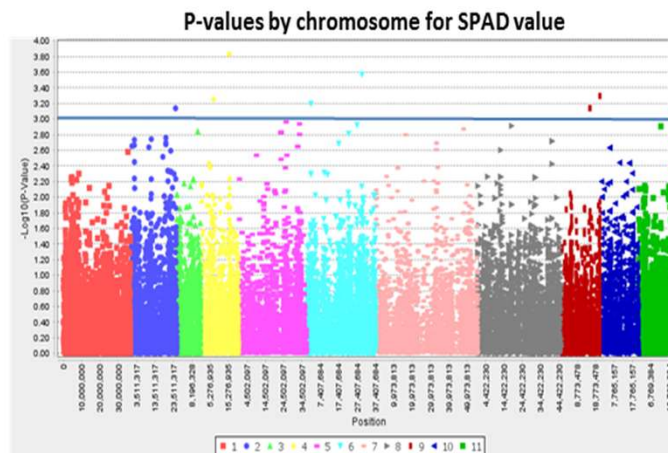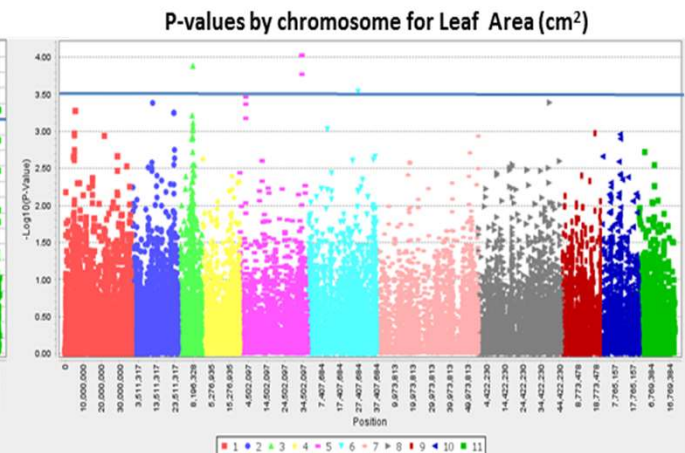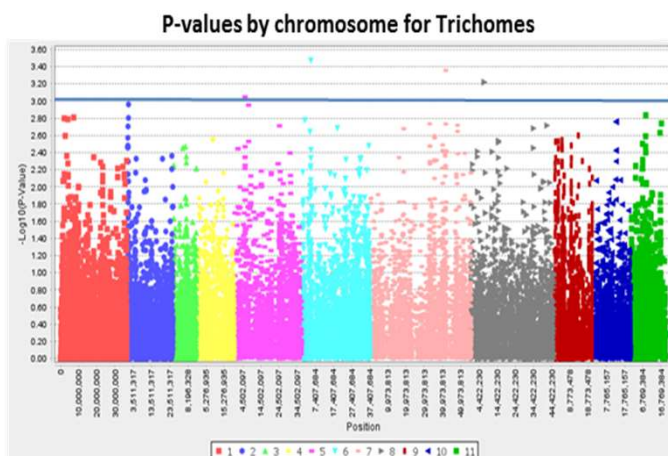

**Figure S4.** Manhattan plots showing significant p-values (MLM) for earliness and YMD traits. Colors indicate chromosomes while horizontal lines indicate a common significance level of  $p = 0.0001$  [ $-\log(p) = 4.0$  &  $3.0$ ]. Traits: Days to first flowering, days to 50% flowering, days to 100% flowering, AUDPC, Leaf area, SPAD value & trichomes.

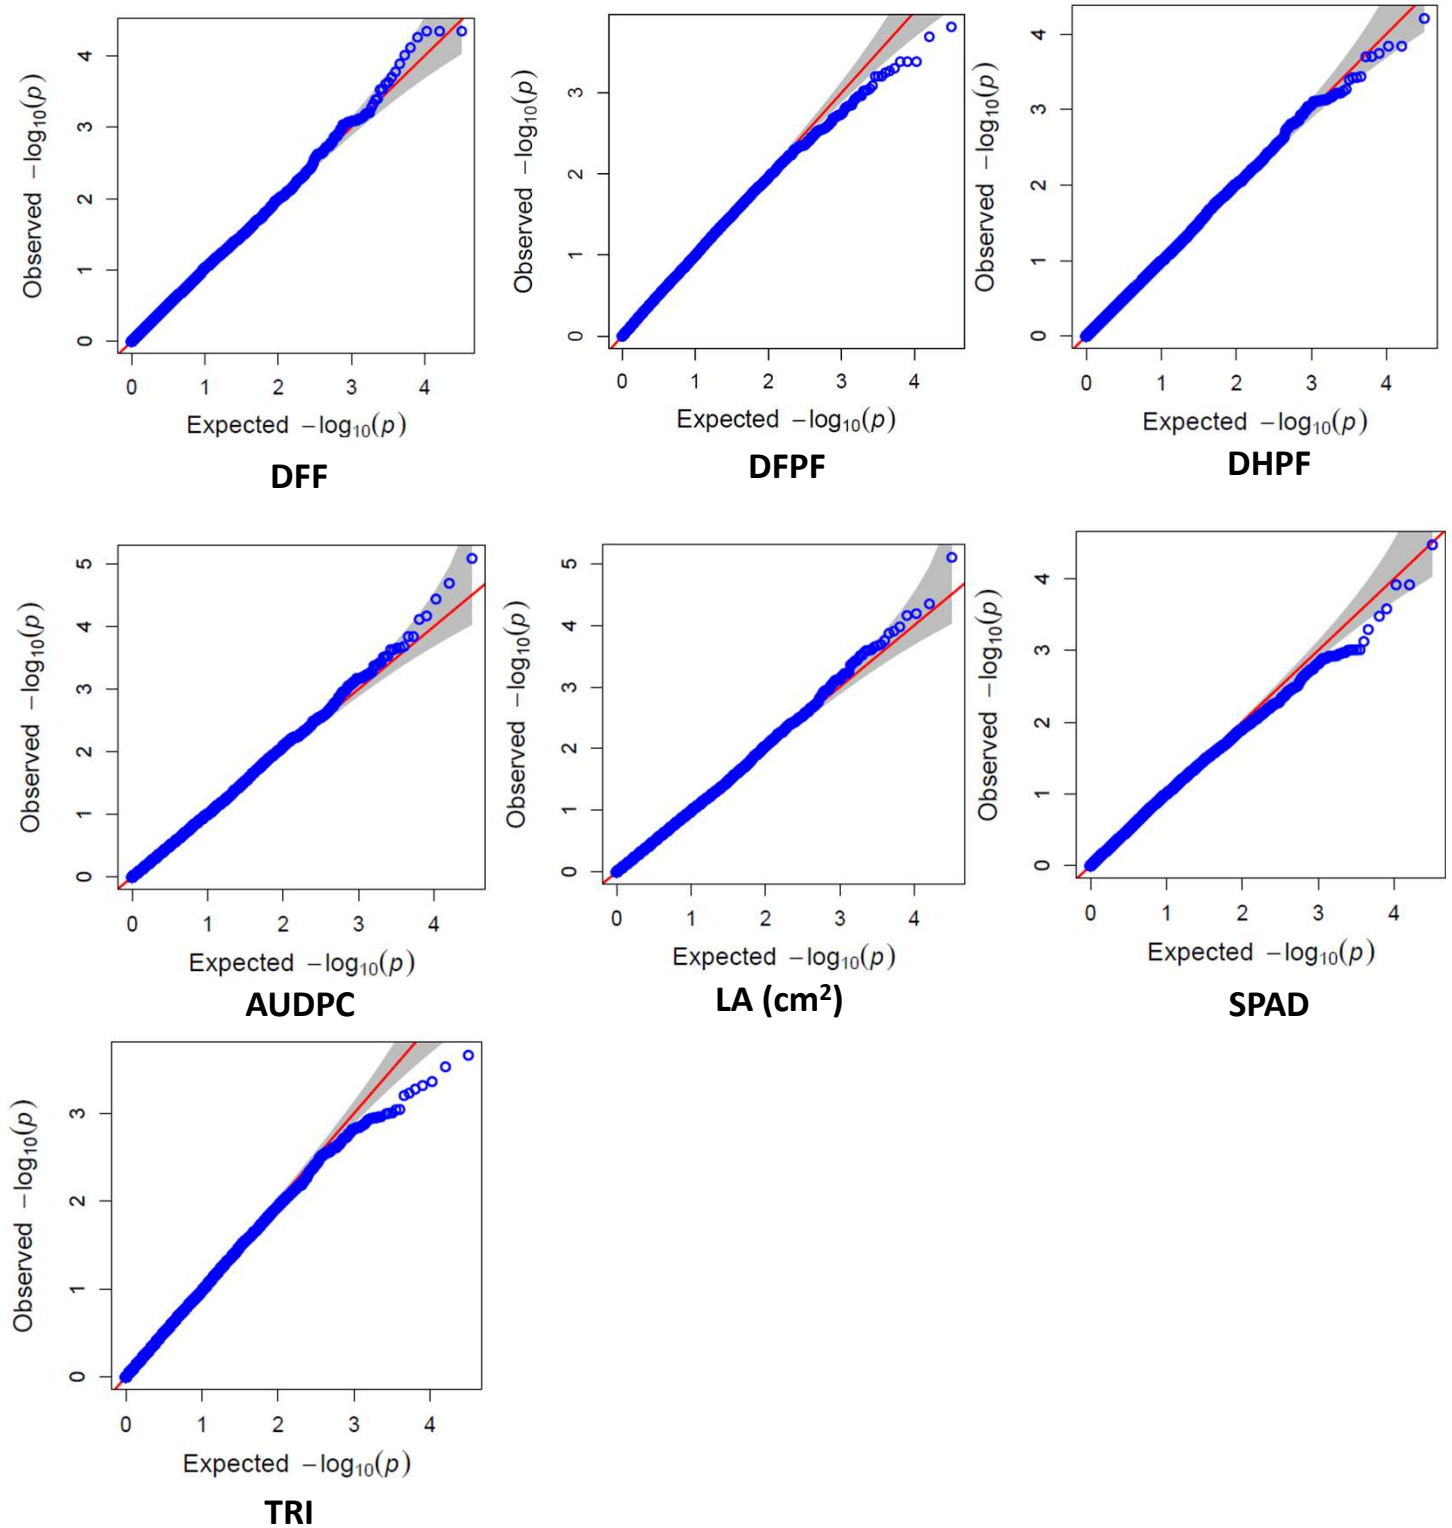

**Figure S5.** Quantile Quantile plots illustrating the comparison between expected and observed  $-\log_{10}(p)$ -values to detect significant genomic loci (genes) associated with earliness and MYMIV disease related traits in mungbean. *DFF*, days to first flowering; *DFPF*, days to 50% flowering; *DHPF*, days to 100% flowering; *AUDPC*, Area under the disease progressive curve; *LA*, leaf area; *SPAD*, Soil Plant Analysis Development; *TRI*, trichomes;

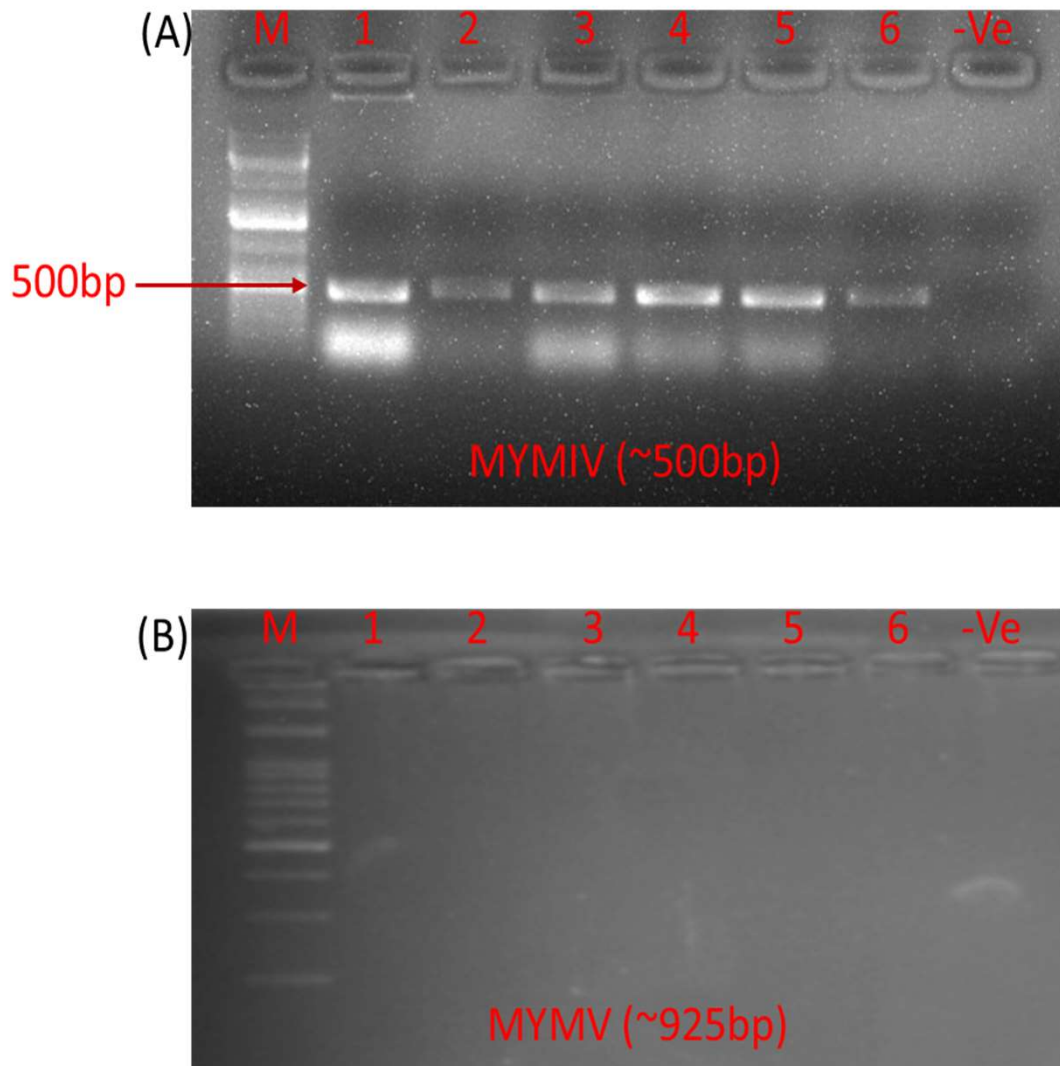

**Figure S6: MYMIV gene specification amplification of susceptible mungbean genotypes.** (A) MYMIV specific amplification (~500bp) using AV1 gene specific primers (BM925F and BM926R). The presence of band was observed in all the susceptible mungbean samples. B) No amplification was observed when MYMV gene specific primers (AVI1- Fwd and AC1- Rev) was used. Where, M: DNA ladder; -Ve: Negative control; 1-6: No. of susceptible mungbean genotypes; M: Marker

# Days to Flowering

AtGenExpress eFP: AT2G30580 / AtDRIP2, BMI1A, DRIP2

(a)

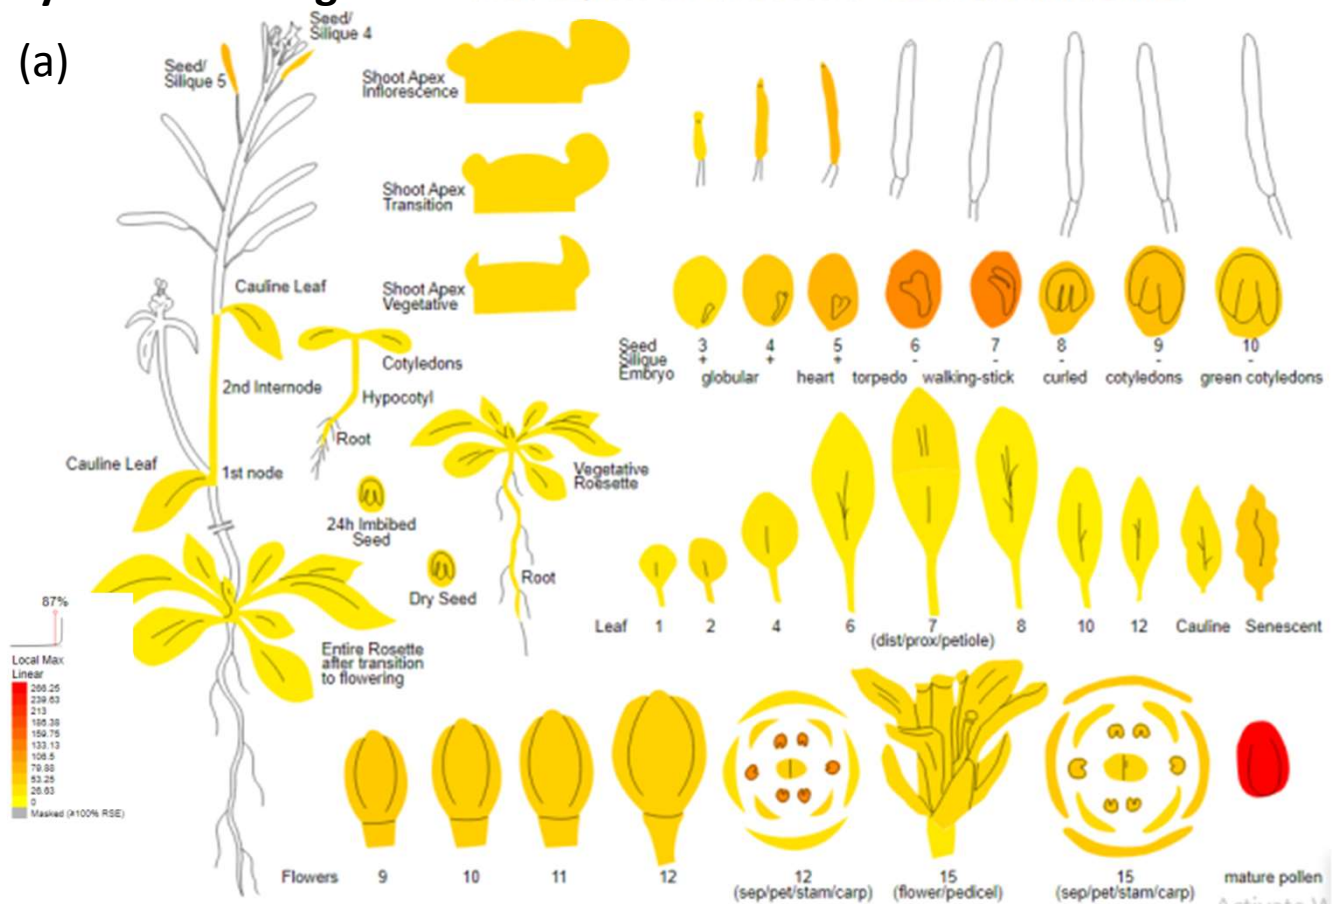

## E3 ubiquitin protein ligase DRIP2

(b)

AtGenExpress eFP: AT4G23650 / AtCDPK6, CDPK6, CPK3

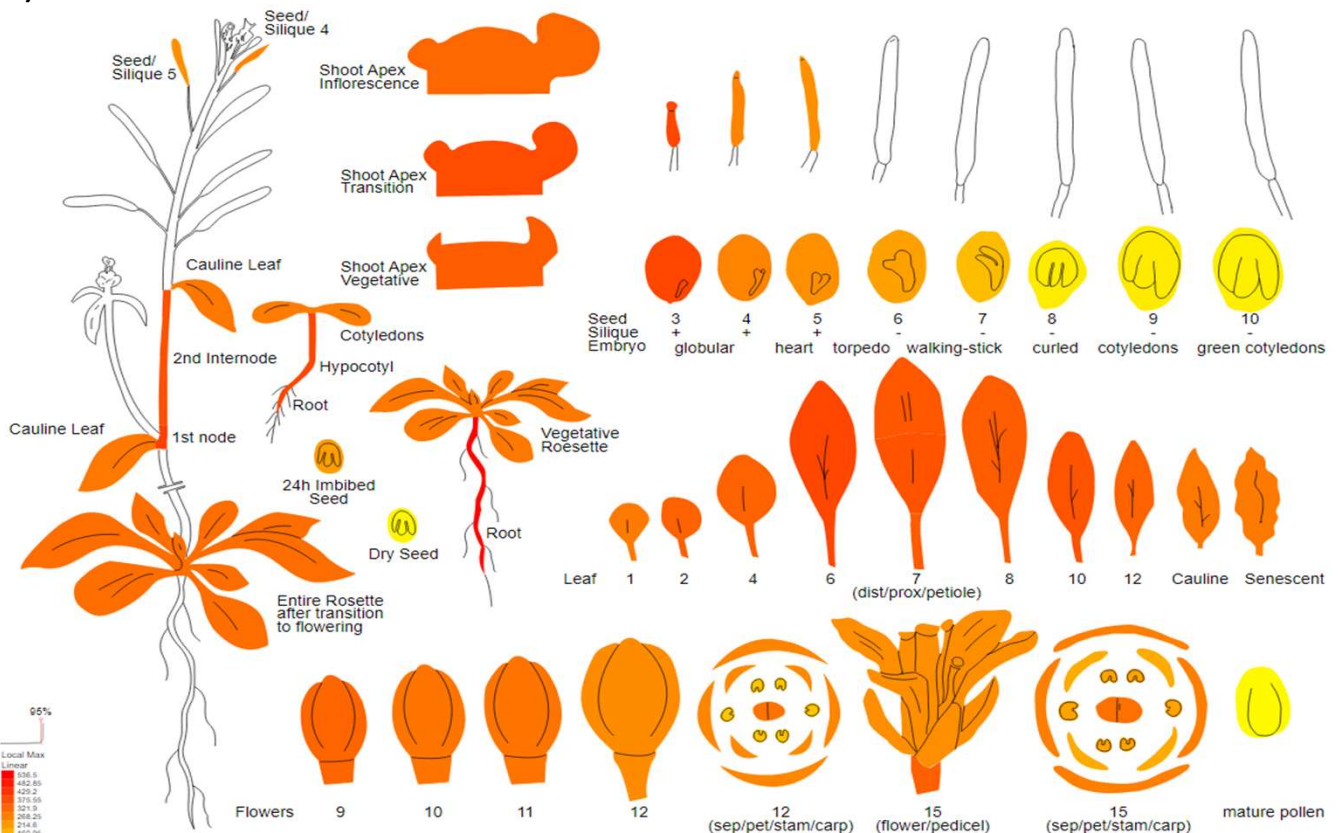

## Calcium-dependent protein kinase 6

**Figure S7.** Details of 11 candidate genes validated using in-silico expression analysis. **(a)** E3 ubiquitin protein ligase DRIP2 expression for flowering on chr. 6. **(b)** Calcium-dependent protein Kinase 1 expression for flowering on chr. 7.

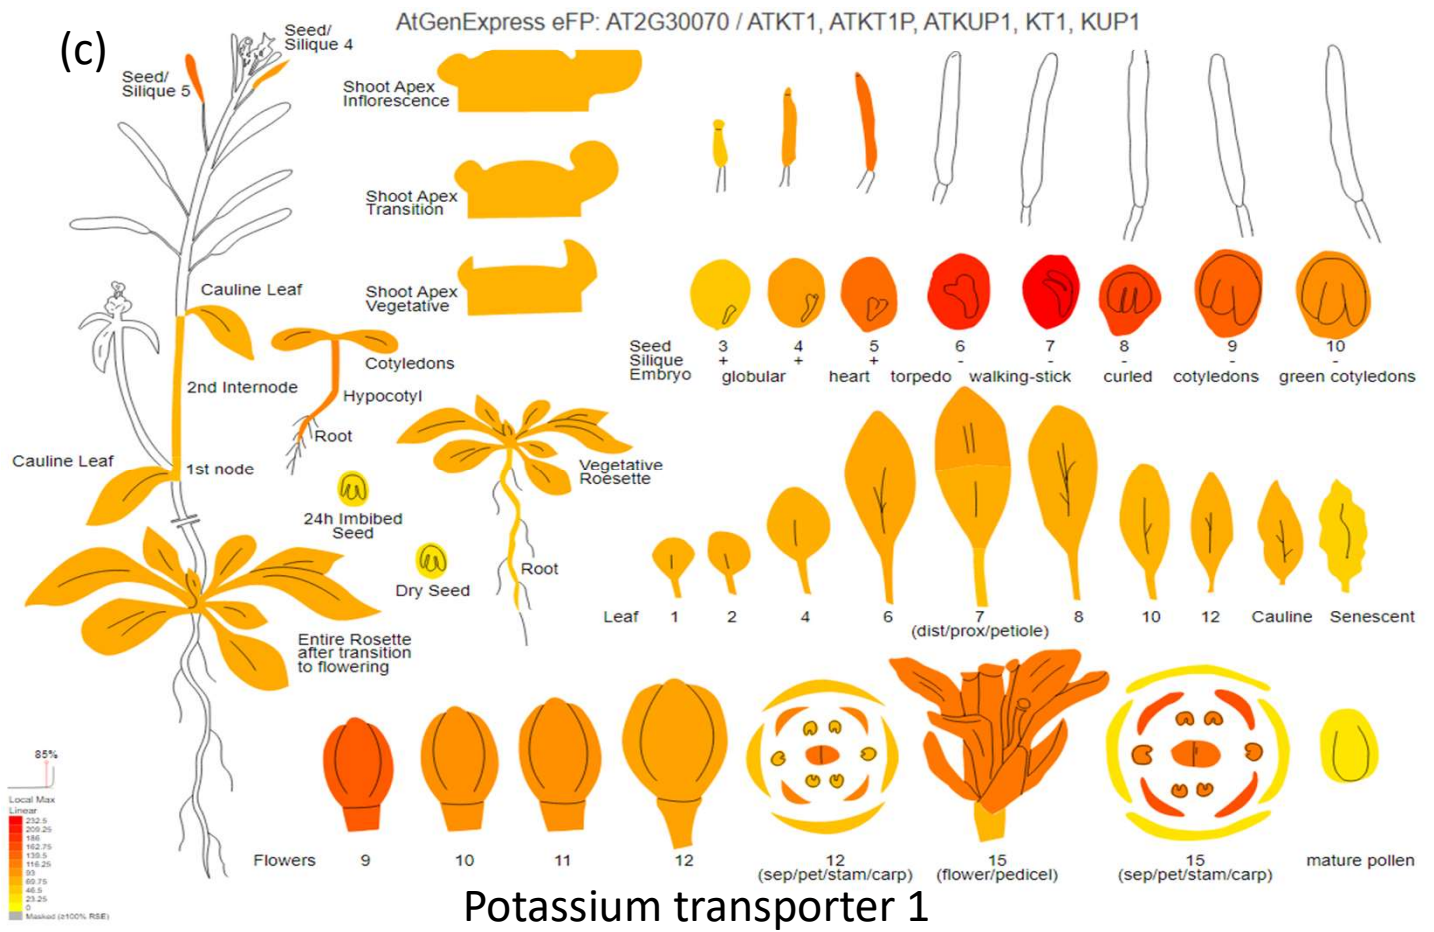

AtGenExpress eFP: AT4G37790 / ABIG1, HAT22

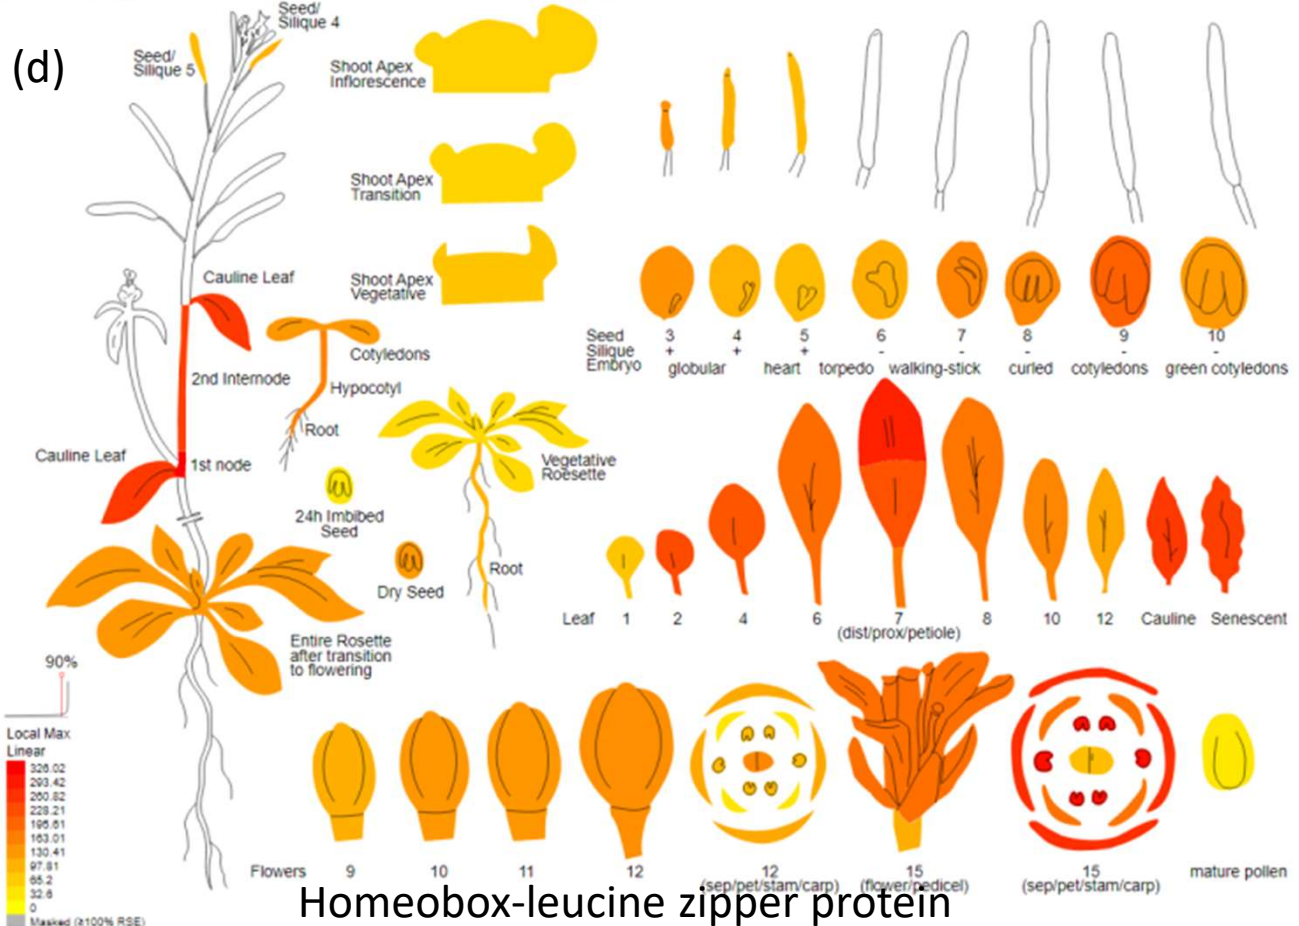

**Figure S7. (c).** Potassium transporter 1 expression for flowering on chr. 7. **(d)** Homeobox-leucine zipper protein expression for flowering on chr. 5.



# Disease related

AtGenExpress eFP: AT1G68690 / AtPERK9, PERK9

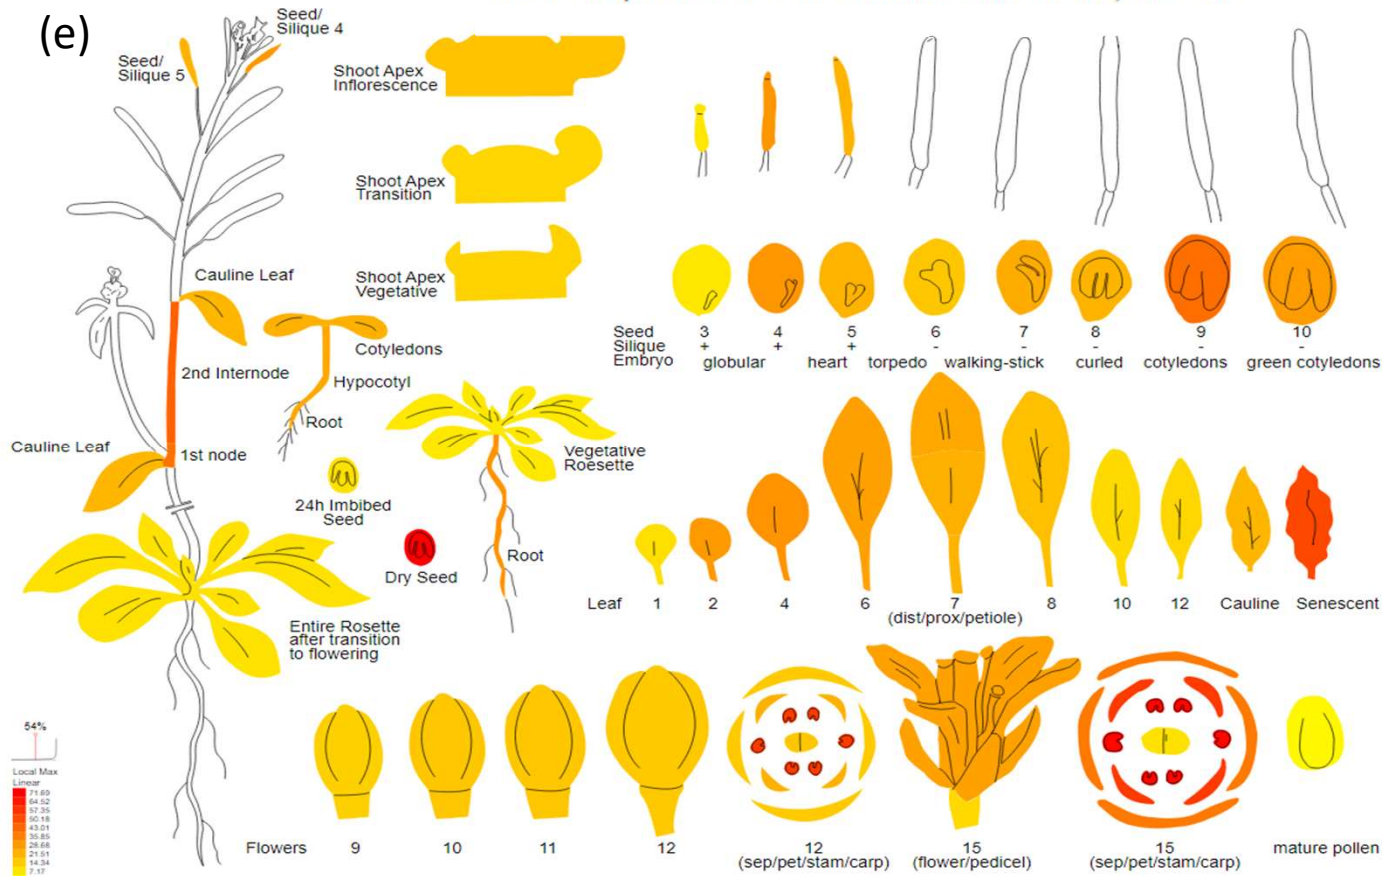

## Protein kinase superfamily protein

AtGenExpress eFP: AT5G36930

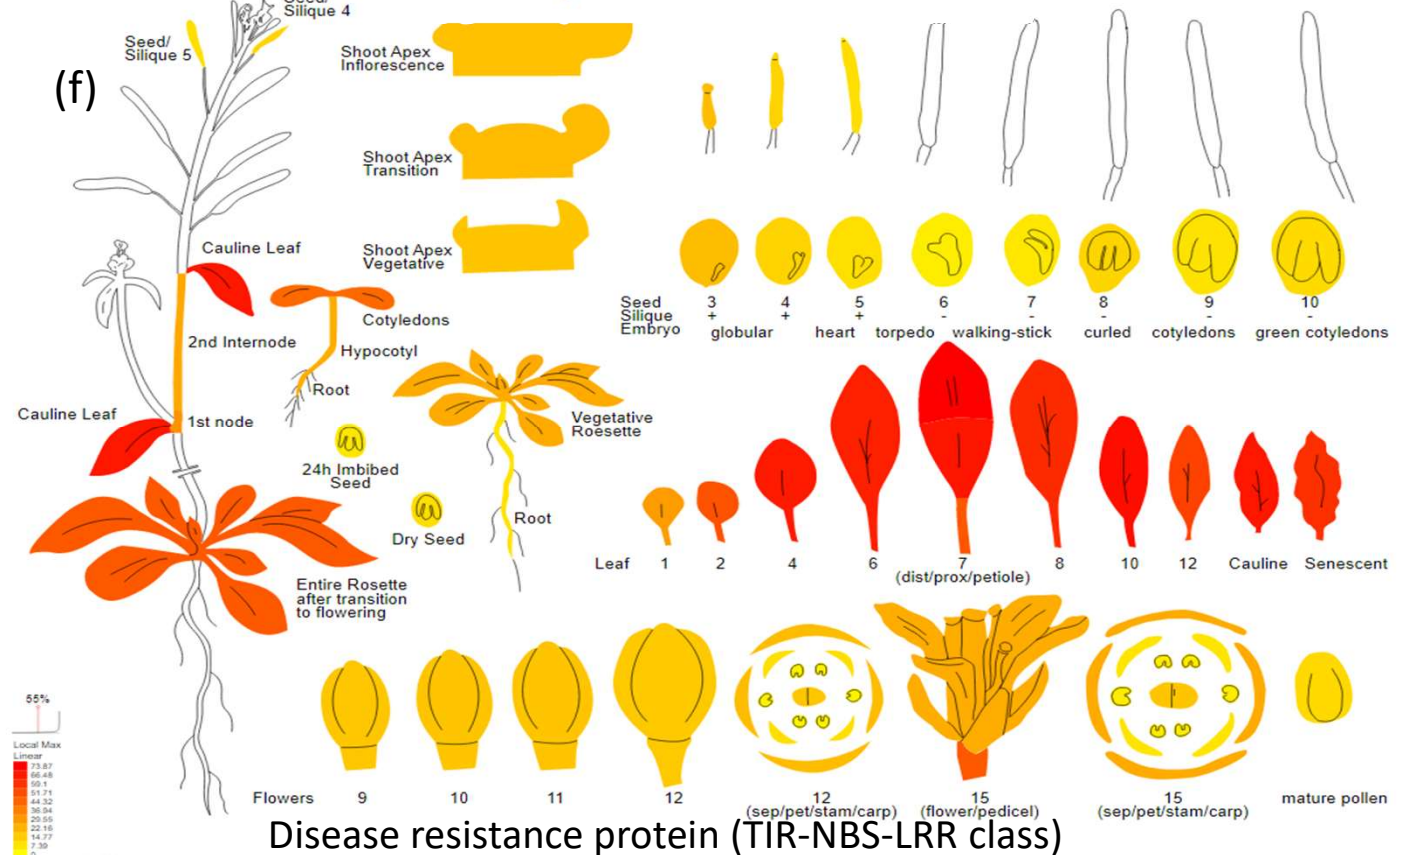

## Disease resistance protein (TIR-NBS-LRR class)

**Figure S7. (e)** Protein kinase superfamily protein expression for disease resistance in leaves on chr. 6. **(f)** Disease resistance protein (TIR-NBS-LRR class) expression for YMD on chr. 9.

## AtGenExpress eFP: AT1G11290 / CRR22

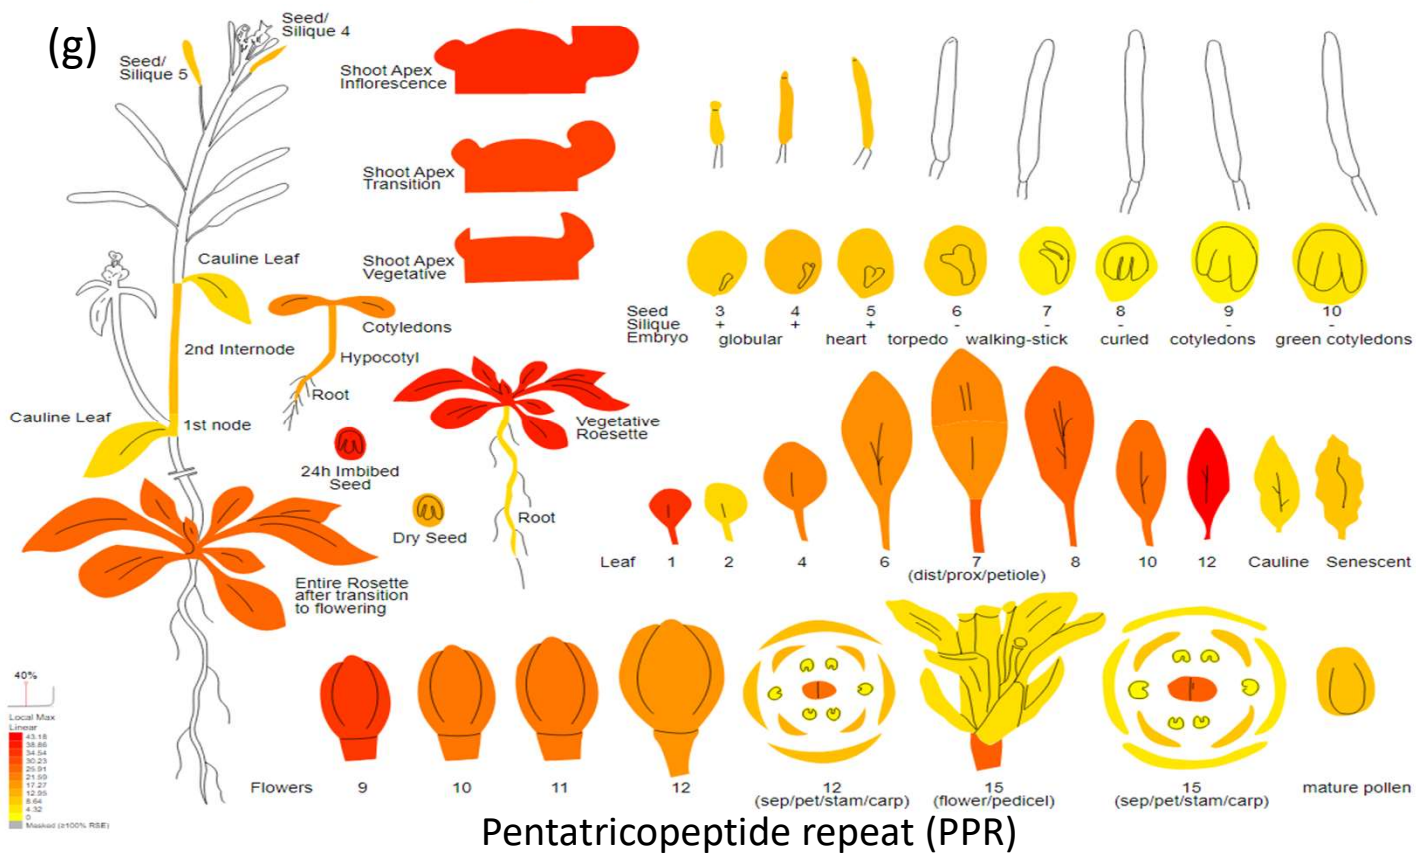

## AtGenExpress eFP: AT2G21290

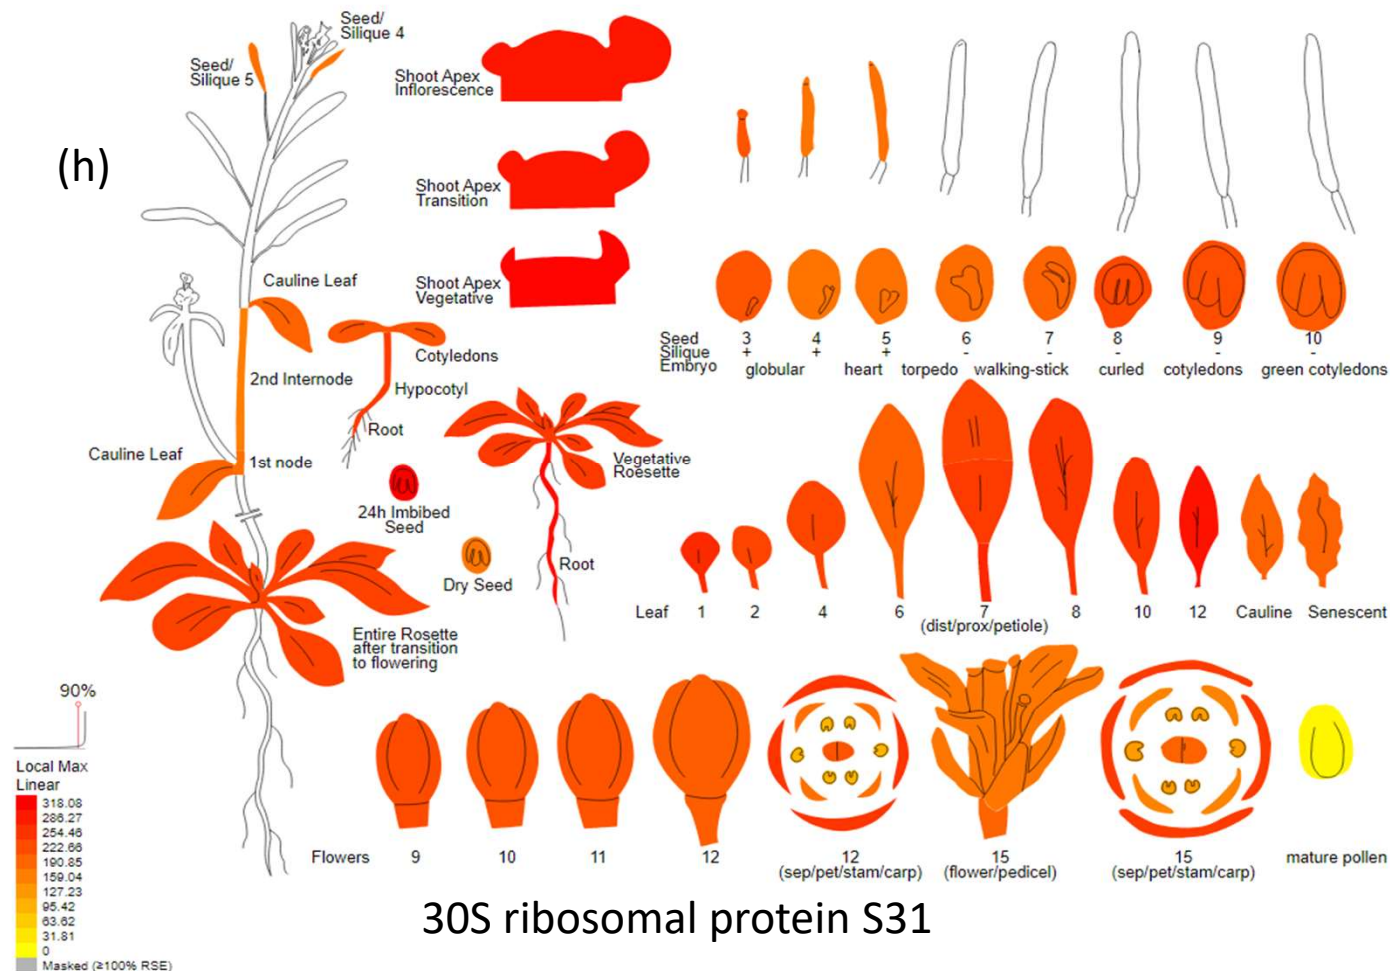

**Figure S7.** (g) Pentatricopeptide repeat (PPR) superfamily protein gene expression for disease resistance in leaves on chr. 5. (h) 30S ribosomal protein S31 gene expression for disease resistance in leaves on chr. 9.

## Leaf area

AtGenExpress eFP: AT4G01250 / AtWRKY22, WRKY22

(i)

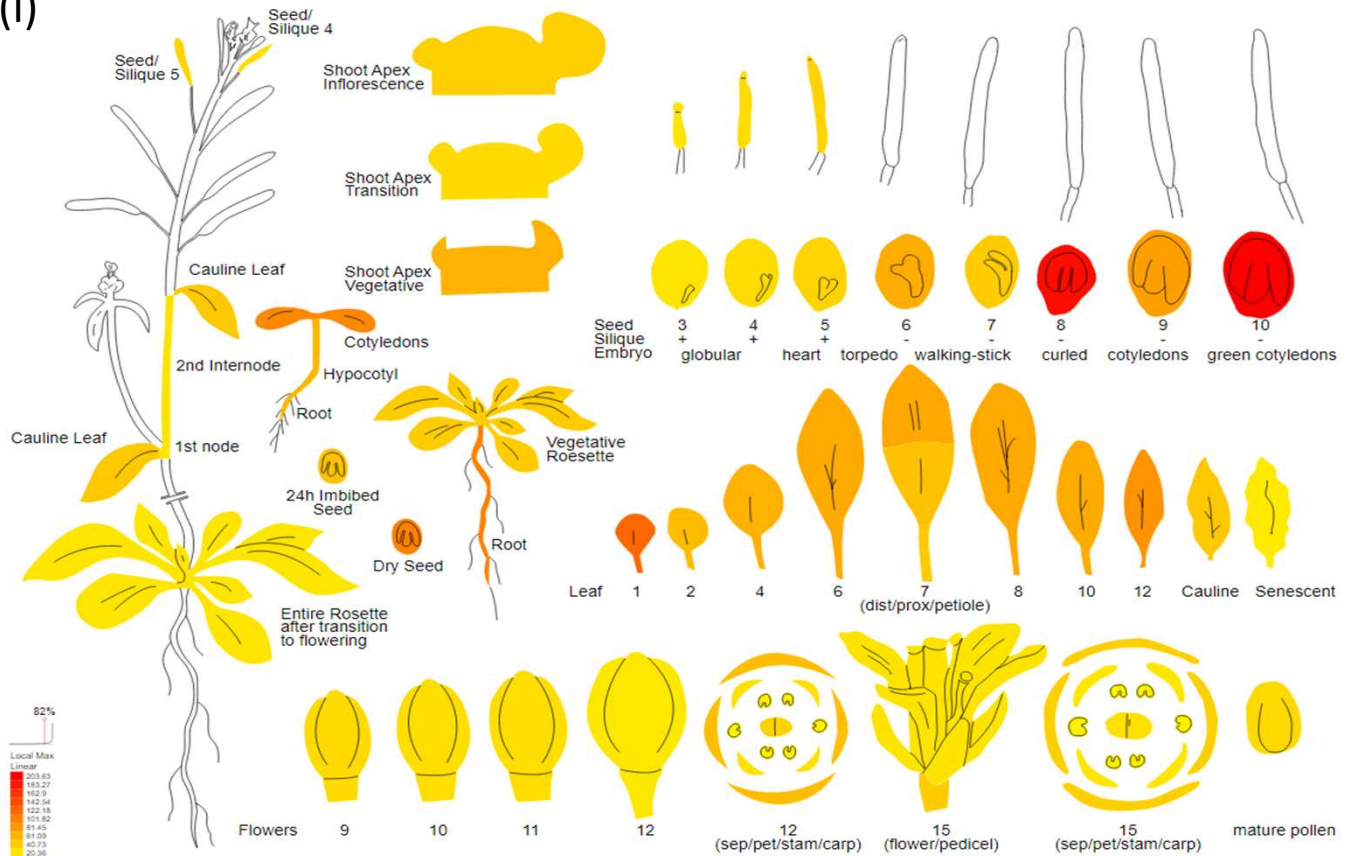

## WRKY family transcription factor

## Trichomes

AtGenExpress eFP: AT3G11090 / LBD21

(j)

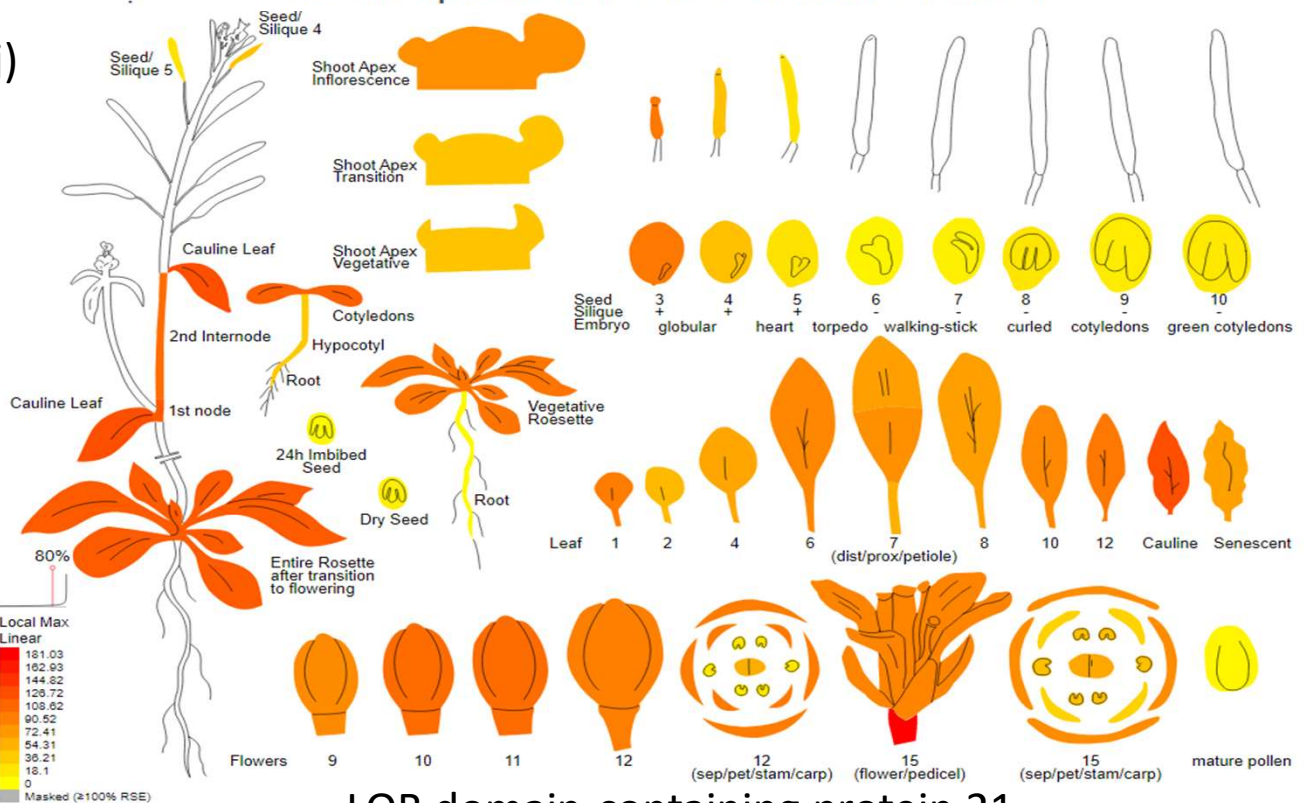

## LOB domain-containing protein 21

**Figure S7. (i)** WRKY family transcription factor gene expression in leaf on chr. 3. **(j)** LOB domain-containing protein 21 gene expression in trichomes on chr. 6.

SPAD

AtGenExpress eFP: AT2G01735 / RIE1

(k)

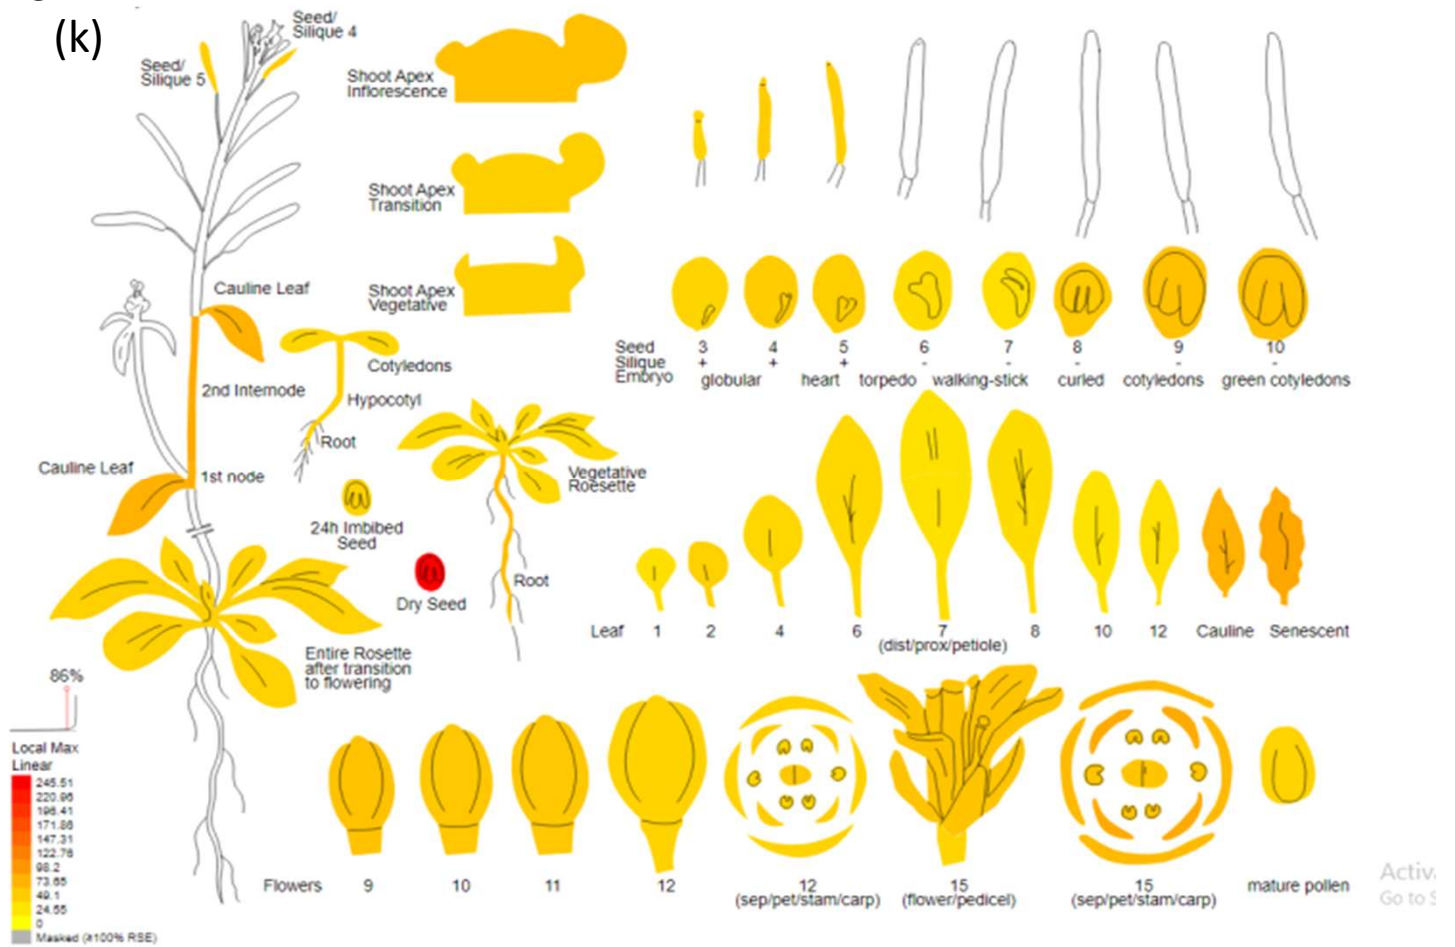

## E3 ubiquitin protein ligase RIE1

**Figure S7. (K)** E3 ubiquitin protein ligase RIE1 gene expression in for chlorophyll content/ SPAD value on chr. 11.
